# Supplementary material
Source: PubMed Central journal article supplement (PMC10405278)
Supplement: NIHMS1921599-supplement-si.pdf [file NIHMS1921599-supplement-si.pdf]

## Supporting Information

### **Investigation of the Inhibition Mechanism of Xanthine Oxidoreductase by Oxipurinol: A Computational Study**

Yazdan Maghsoud,<sup>1</sup> Chao Dong,<sup>2</sup> and G. Andrés Cisneros<sup>\*,1,3</sup>

<sup>1</sup>*Department of Chemistry and Biochemistry, The University of Texas at Dallas, Richardson, TX 75080, USA*

<sup>2</sup>*Department of Chemistry and Physics, The University of Texas Permian Basin, Odessa, TX 79762, USA*

<sup>3</sup>*Department of Physics, The University of Texas at Dallas, Richardson, TX 75080, USA*

\*E-mail: [andres@utdallas.edu](mailto:andres@utdallas.edu)

# Contents

|     |                                                                     |    |
|-----|---------------------------------------------------------------------|----|
| 1.  | Refinement of the Bovine Milk XO–Oxipurinol Crystal Structure ..... | 1  |
| 2.  | Parameterized Structures of the Non-Standard Residues.....          | 2  |
| 3.  | Structural Analysis .....                                           | 3  |
| 4.  | Clustering Analysis .....                                           | 18 |
| 5.  | Components of the QM Subregion .....                                | 21 |
| 6.  | Oxipurinol Tautomers.....                                           | 22 |
| 7.  | EDA on the Pre-Catalytic Inhibition.....                            | 23 |
| 8.  | Binding Affinities .....                                            | 26 |
| 9.  | QM/MM interaction Energies ( $IE_{QM/MM}$ ) .....                   | 26 |
| 10. | Electron Localization Functions (ELF) .....                         | 27 |
| 11. | Non-covalent Interactions (NCI).....                                | 28 |
| 12. | Mutagenesis Studies vs. the Non-bonded Interaction .....            | 29 |
| 13. | Tautomer-2 (OXI <sup>T-2</sup> ) .....                              | 30 |

## 1. Refinement of the Bovine Milk XO–Oxipurinol Crystal Structure

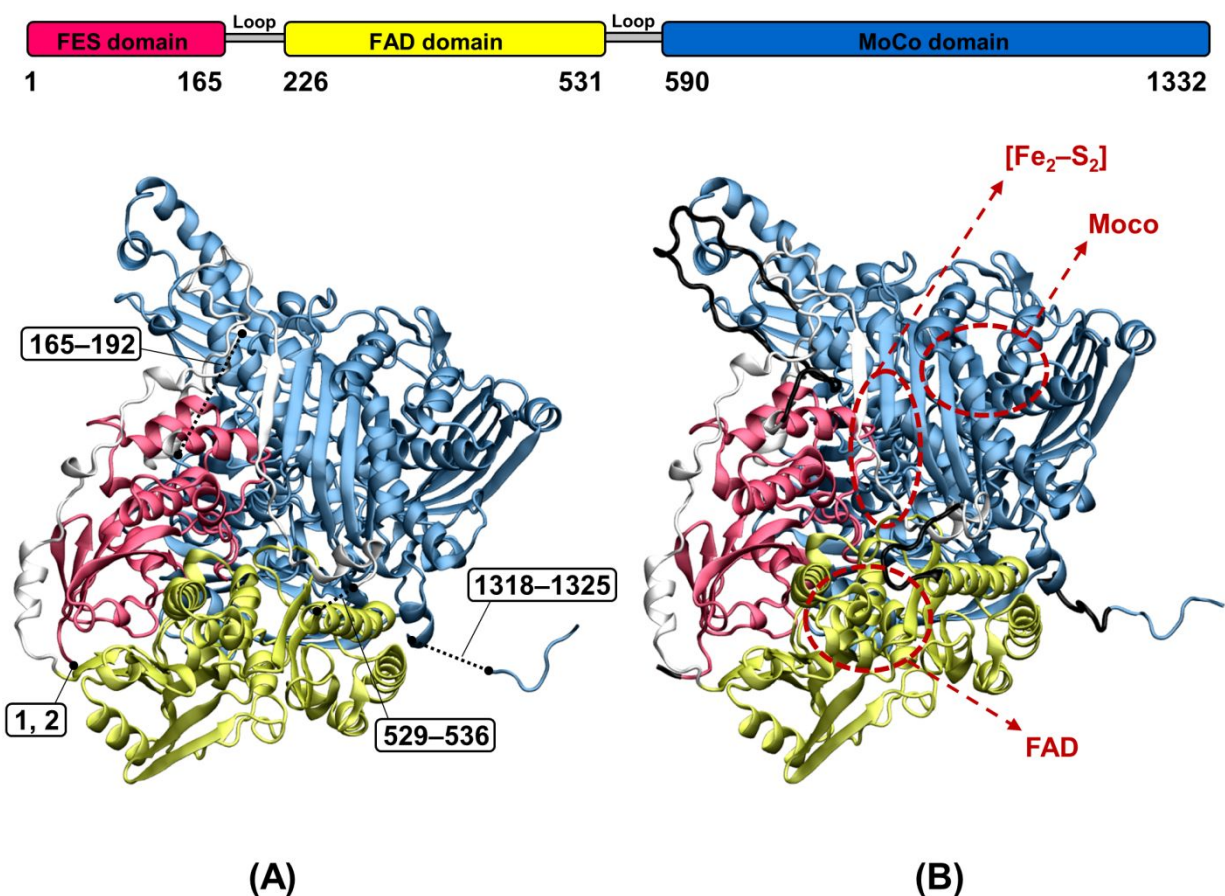

**Figure S1.** (A) The crystal structure of xanthine oxidase in complex with oxipurinol (PDB ID: 3BDJ) and its missing residues (1, 2, 165–192, 529–536, and 1318–1325). Missing residues are shown with corresponding residue numbers in dashed lines. (B) The modeled structure for XO–oxipurinol via MODELLER 10.1 and assessed by CASP and CAMEO. Modeled residues are shown in black ribbons.

After constructing the target-template alignment for 3BDJ, three-dimensional models of the target were calculated by using `automodel` class of MODELLER. Seven different models of XO were generated via the `model-single.py` script based on the 3BDJ. It is worth mentioning that the number of generated models are arbitrary; however, generating five to seven models is sufficient (see Ref. 127 of the manuscript). The best model can be selected by picking the one with the lowest value of the DOPE or SOAP assessment scores (lowest value means mostly negative). Herein, the DOPE assessment score was used for the evaluation. Based on this assessment, the third generated structures (3BDJ\_1.B99990003.pdb) was the best and was selected for further MD simulations (see `model-single.log` file in the ESI). The PDB files of all the MODELLER-generated structures (3BDJ\_1.B99990001.pdb to 3BDJ\_1.B99990007.pdb) as well as the assessment scores are provided in the ESI (ESI-1.zip).

## 2. Parameterized Structures of the Non-Standard Residues

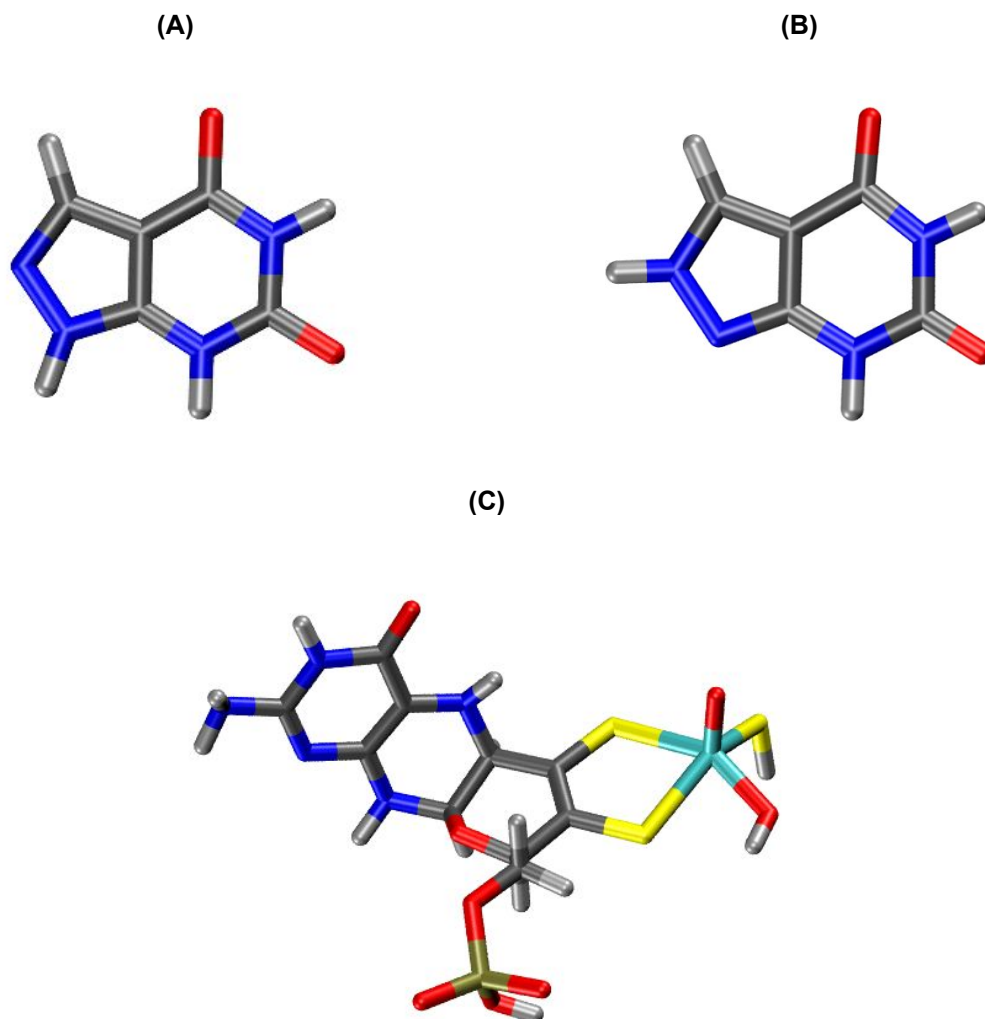

**Figure S2.** Parameterized structures for (A) oxipurinol (OXI), (B) tautomer-2 (OXIT<sup>-2</sup>), and (C) reduced molybdenum cofactor.

### 3. Structural Analysis

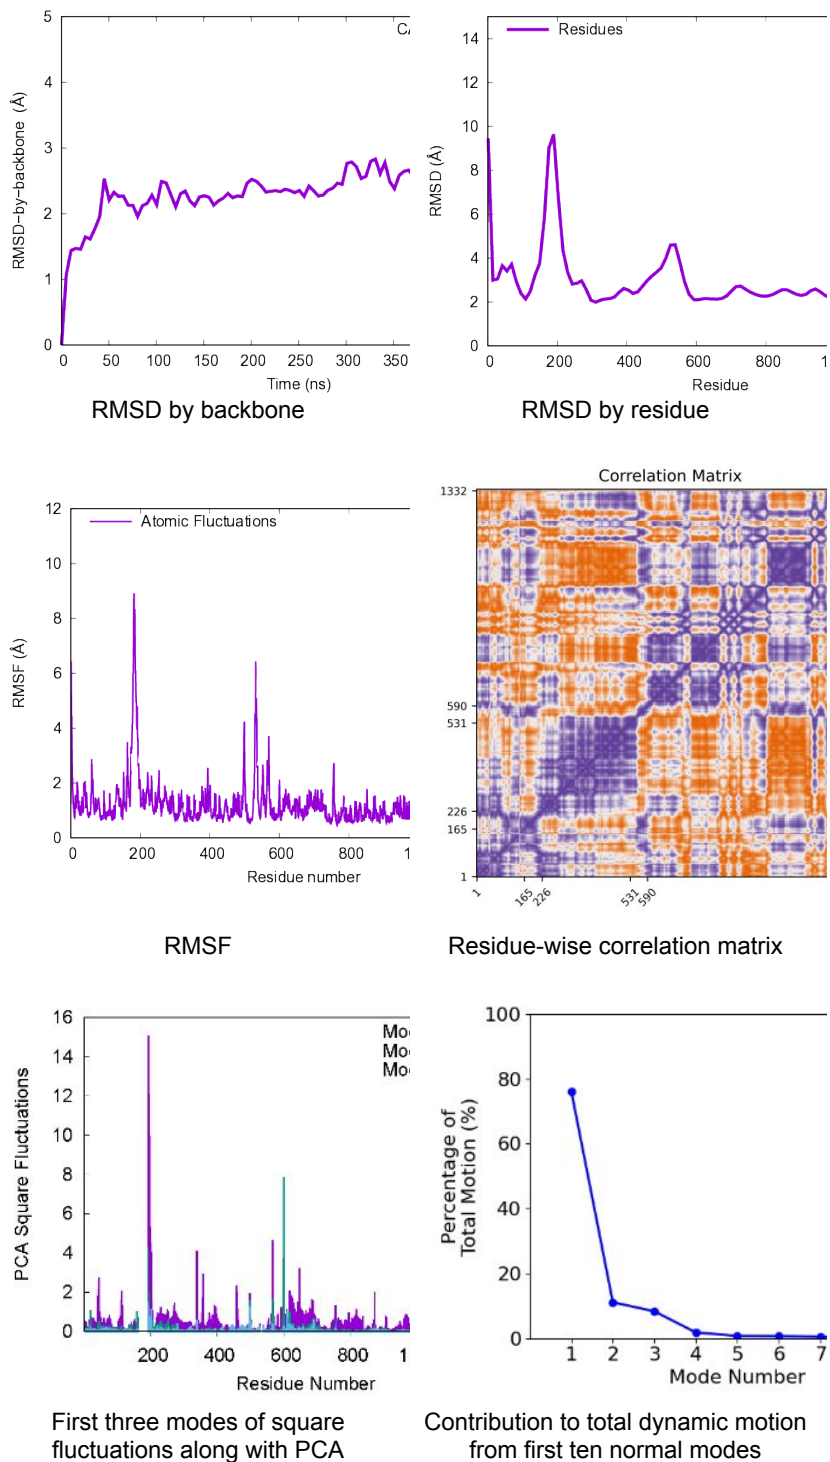

**Figure S3.** Structural analysis results for the MD simulation of the first replicate of the apo-XO. Areas of *correlation* in the residue-wise correlation matrix graph are blue (1.0), areas with *no correlation* are pale yellow (0.0), and areas with *anti-correlation* are red (-1.0).

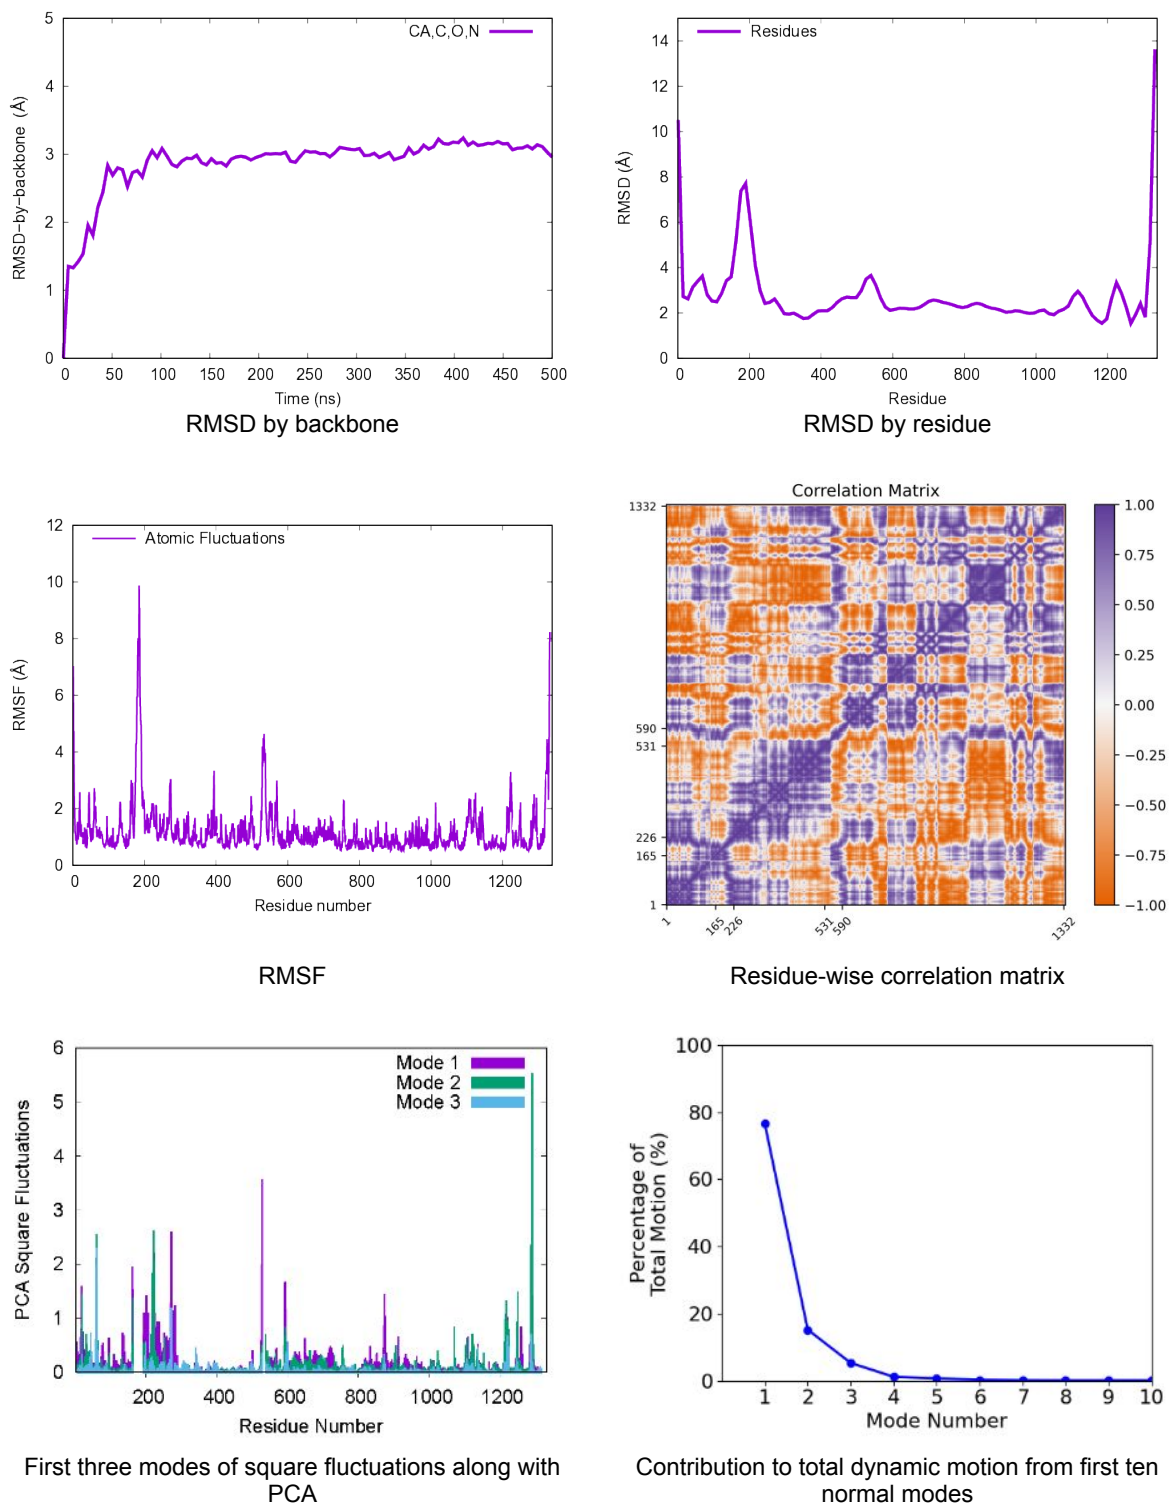

**Figure S4.** Structural analysis results for the MD simulation of the second replicate of the apo-XO. Areas of *correlation* in the residue-wise correlation matrix graph are blue (1.0), areas with *no correlation* are pale yellow (0.0), and areas with *anti-correlation* are red (-1.0).

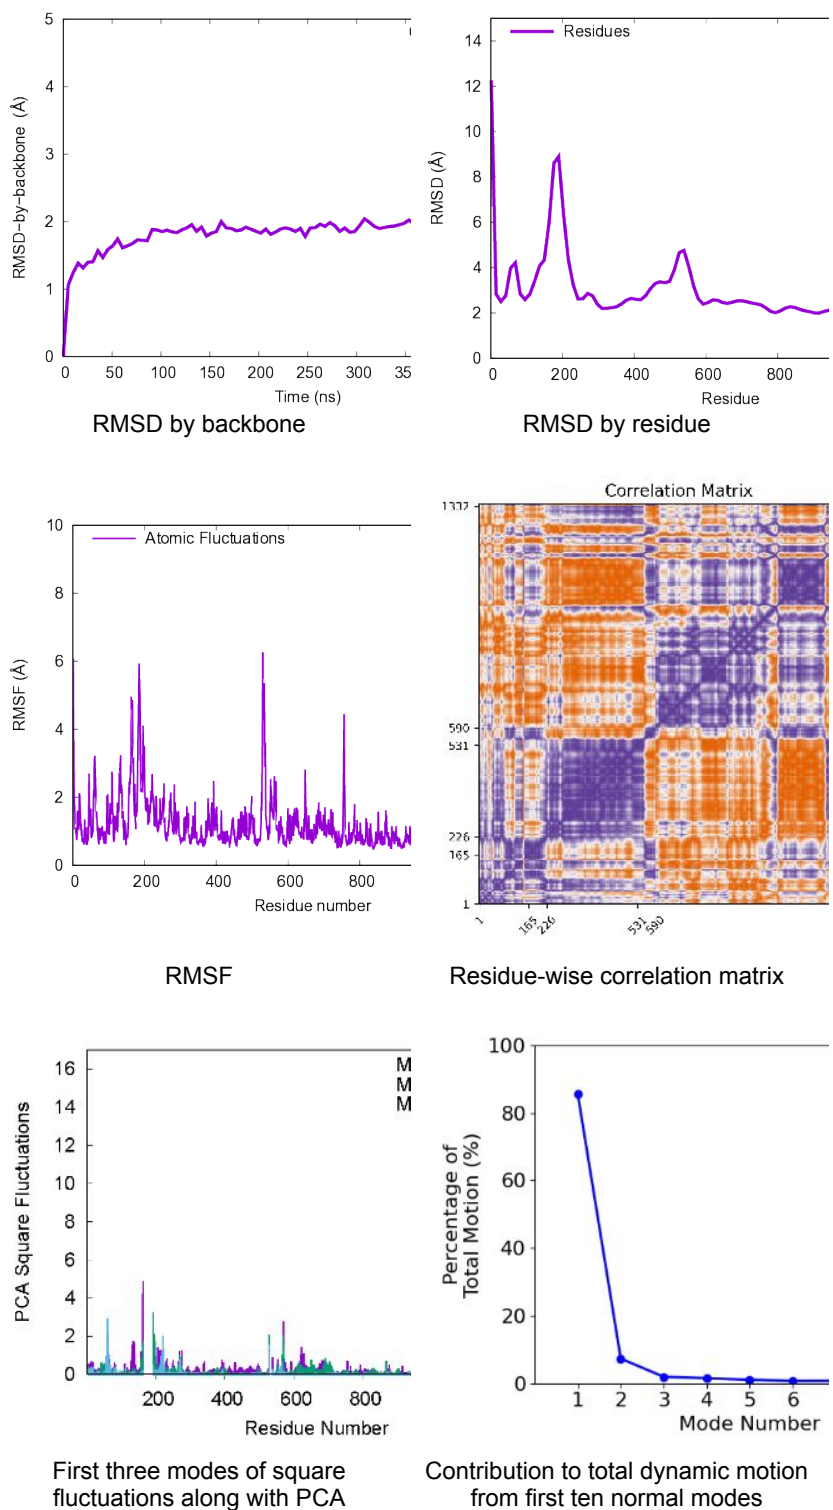

**Figure S5.** Structural analysis results for the MD simulation of the third replicate of the apo-XO. Areas of *correlation* in the residue-wise correlation matrix graph are blue (1.0), areas with *no correlation* are pale yellow (0.0), and areas with *anti-correlation* are red (-1.0).

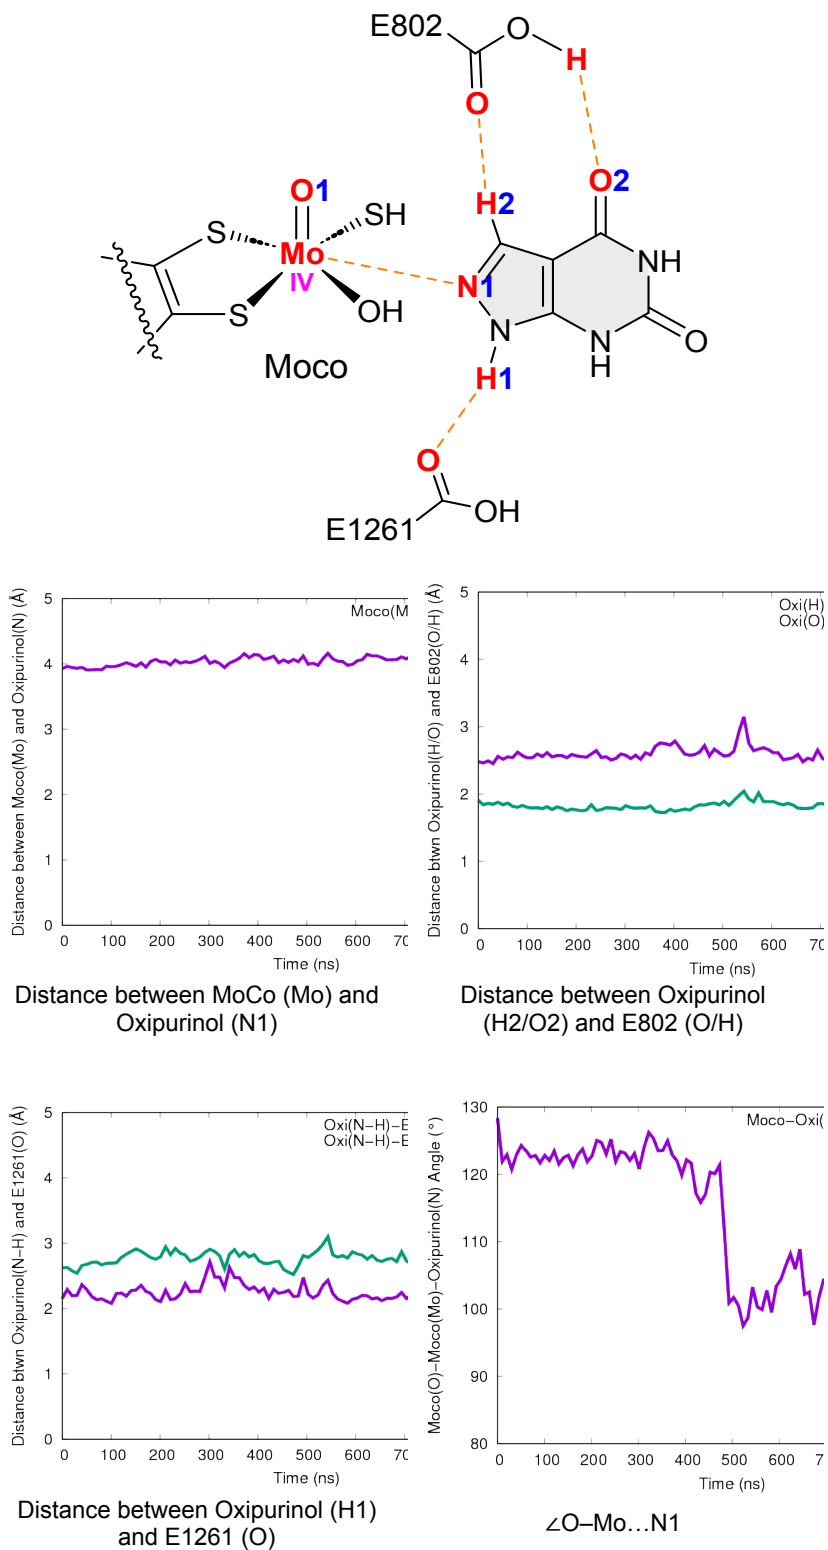

**Figure S6.** Structural analysis results for the MD simulation of the first replicate of the XO-OXI. Areas of *correlation* in the residue-wise correlation matrix graph are blue (1.0), areas with *no correlation* are pale yellow (0.0), and areas with *anti-correlation* are red (-1.0).



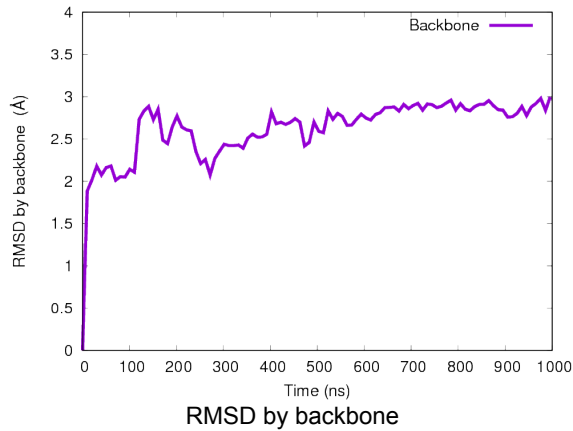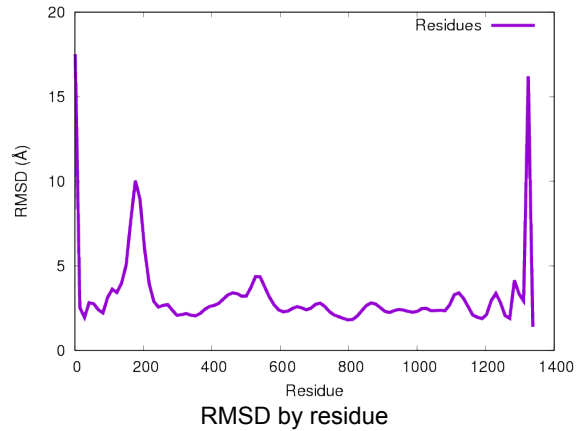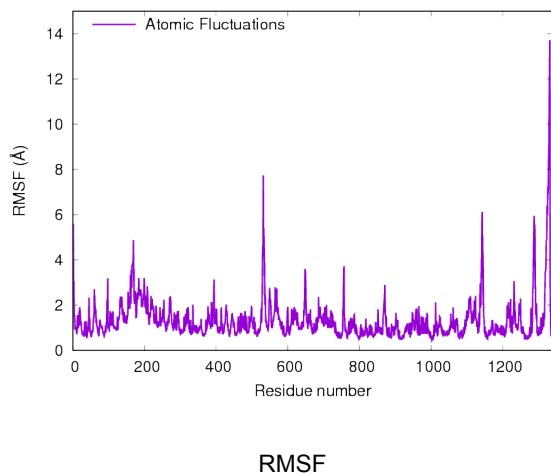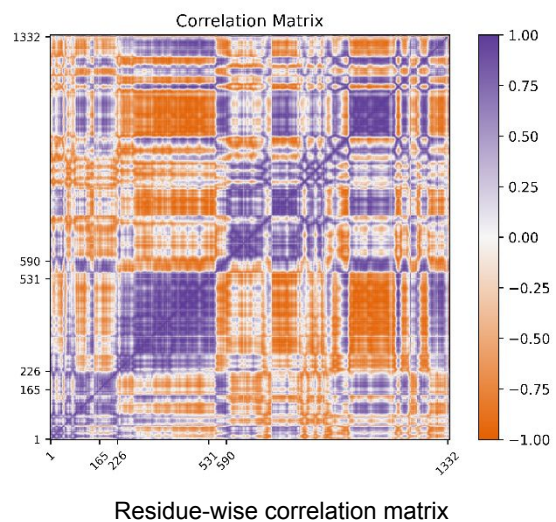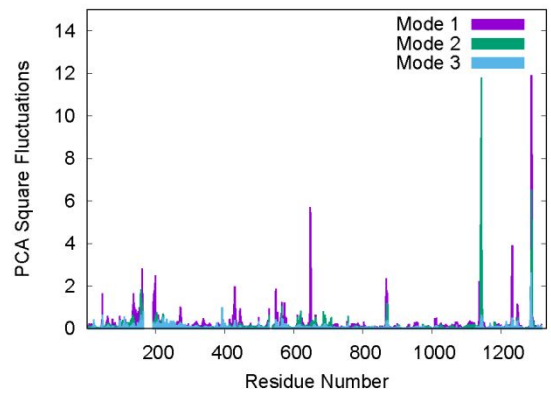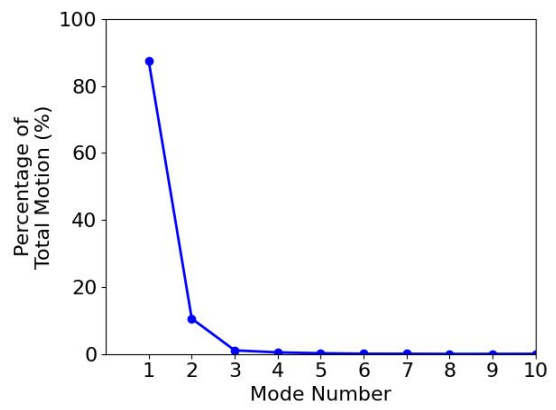

First three modes of square fluctuations along with PCA

Contribution to total dynamic motion from first ten normal modes

Figure S6. Continued.

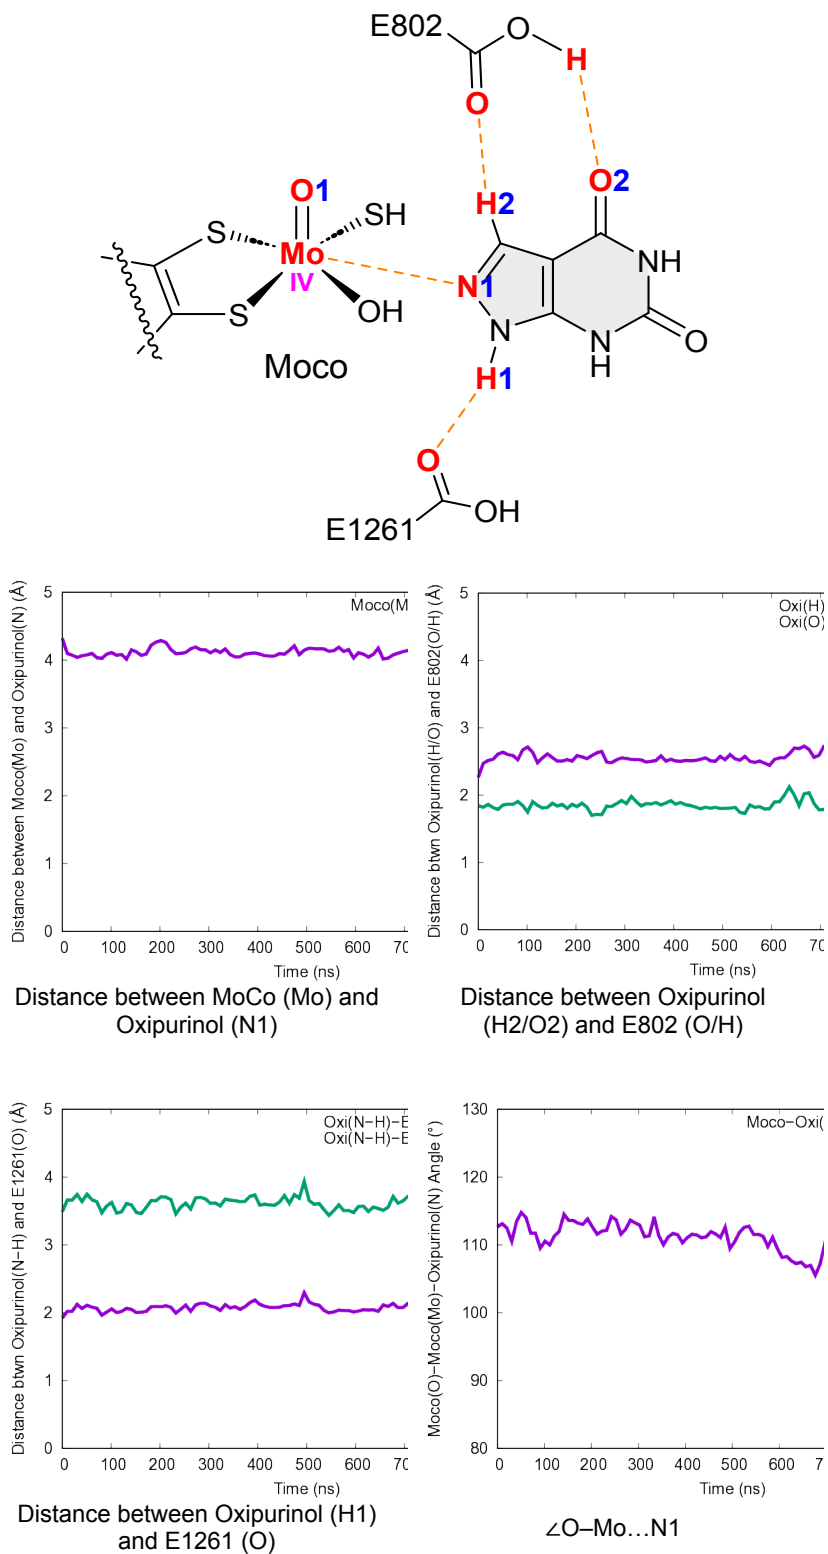

**Figure S7.** Structural analysis results for the MD simulation of the second replicate of the XO–OXI. Areas of *correlation* in the residue-wise correlation matrix graph are blue (1.0), areas with *no correlation* are pale yellow (0.0), and areas with *anti-correlation* are red (–1.0).

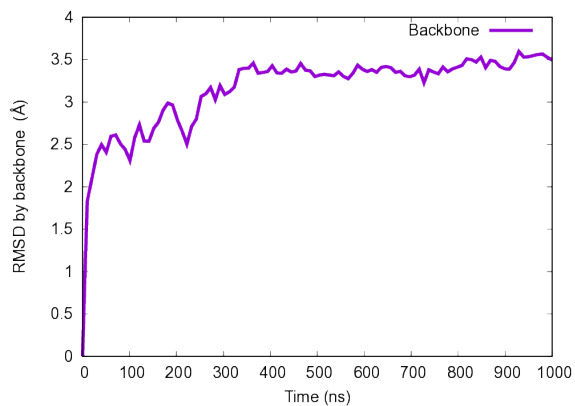

RMSD by backbone

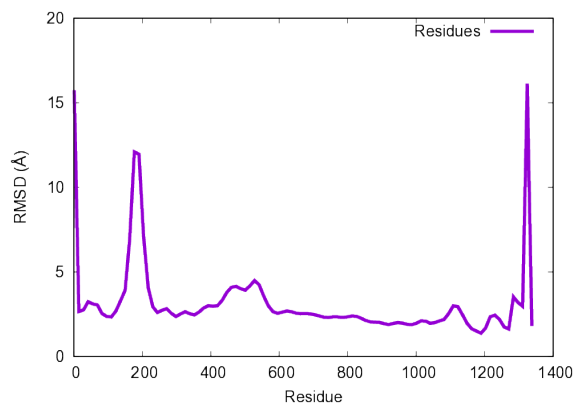

RMSD by residue

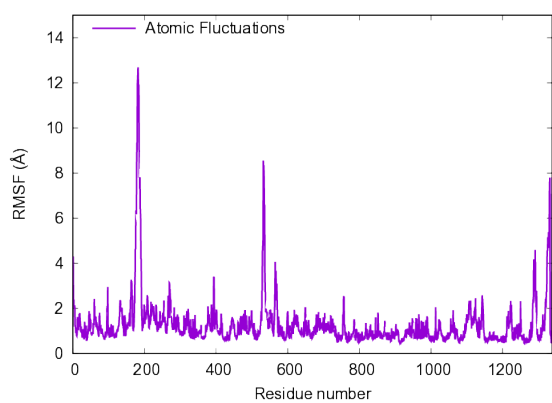

RMSF

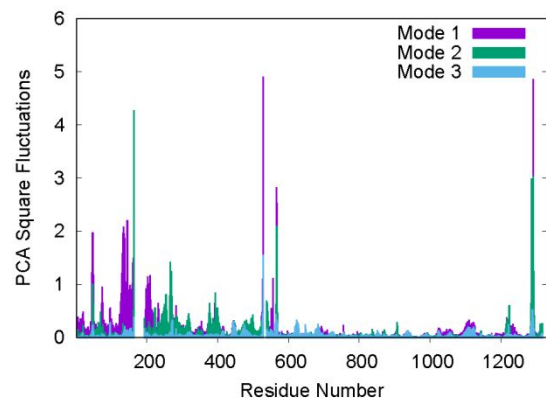

First three modes of square fluctuations along with PCA

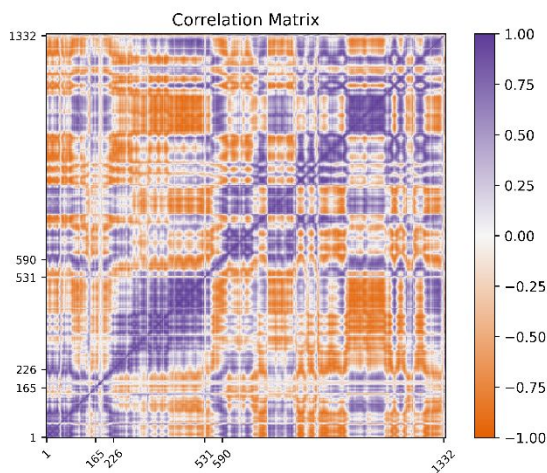

Residue-wise correlation matrix

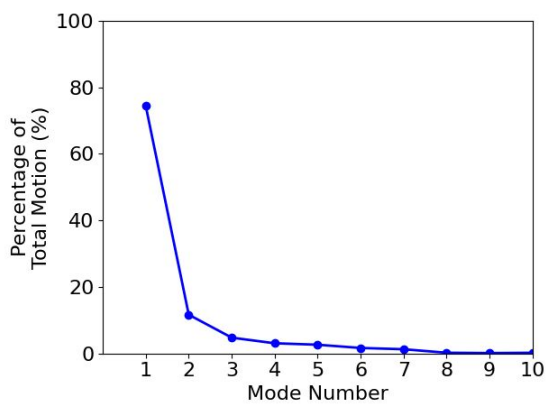

Contribution to total dynamic motion from first ten normal modes

Figure S7. Continued.

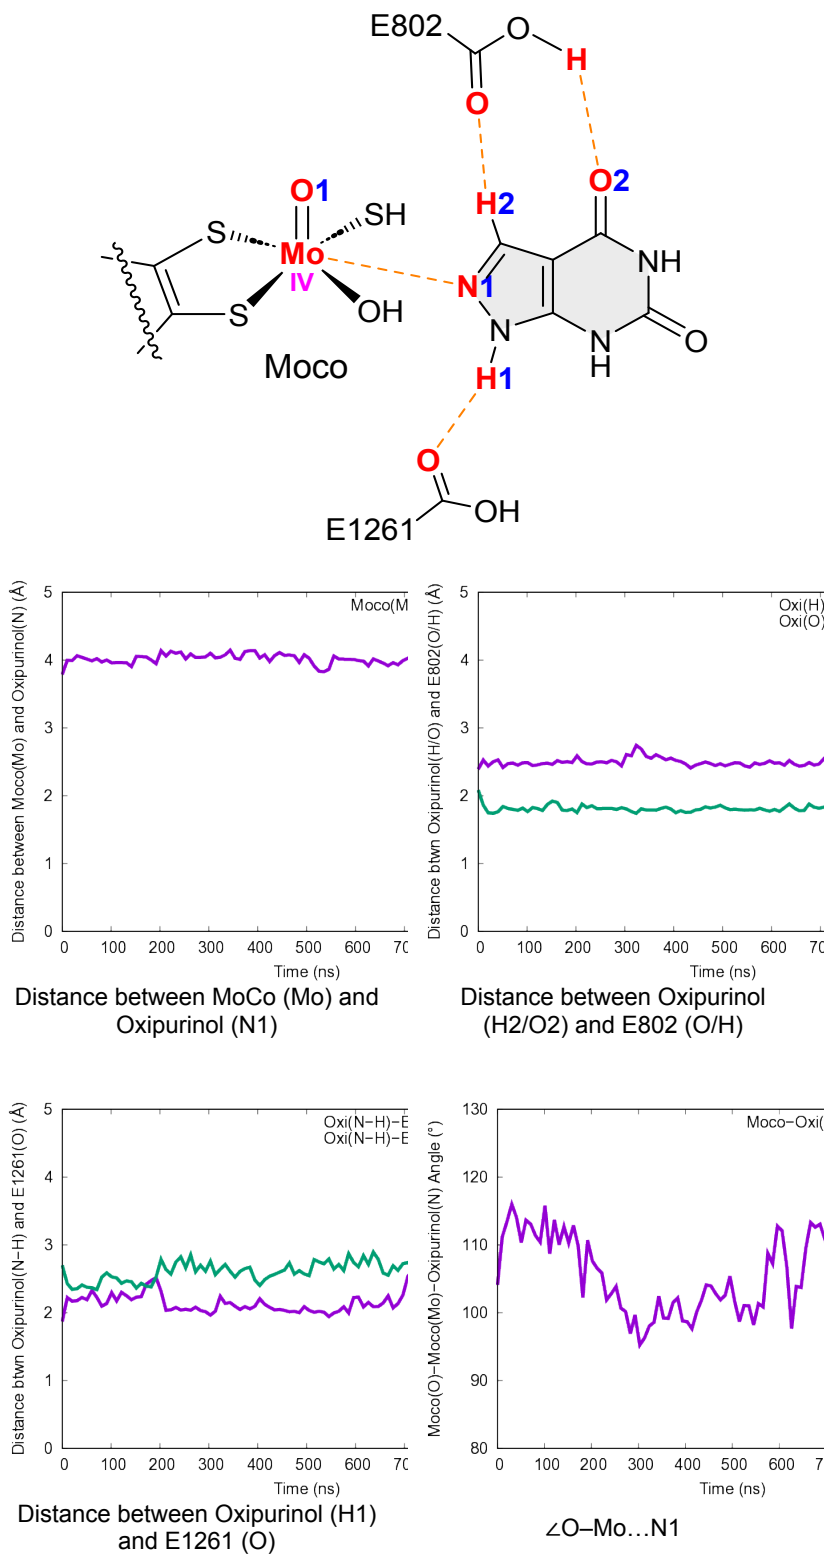

**Figure S8.** Structural analysis results for the MD simulation of the third replicate of the XO-OXI. Areas of *correlation* in the residue-wise correlation matrix graph are blue (1.0), areas with *no correlation* are pale yellow (0.0), and areas with *anti-correlation* are red (-1.0).

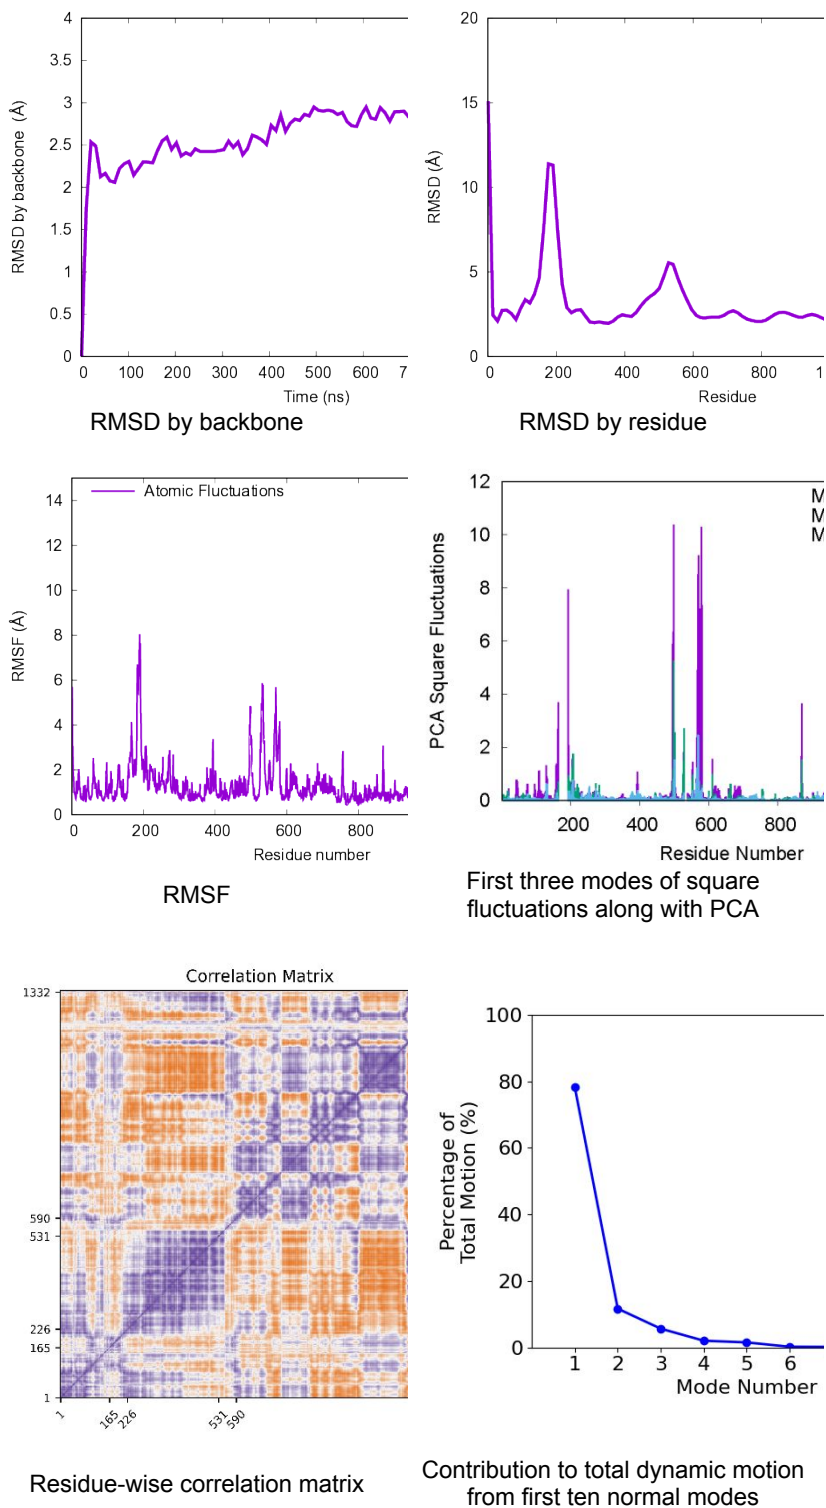

Figure S8. Continued.

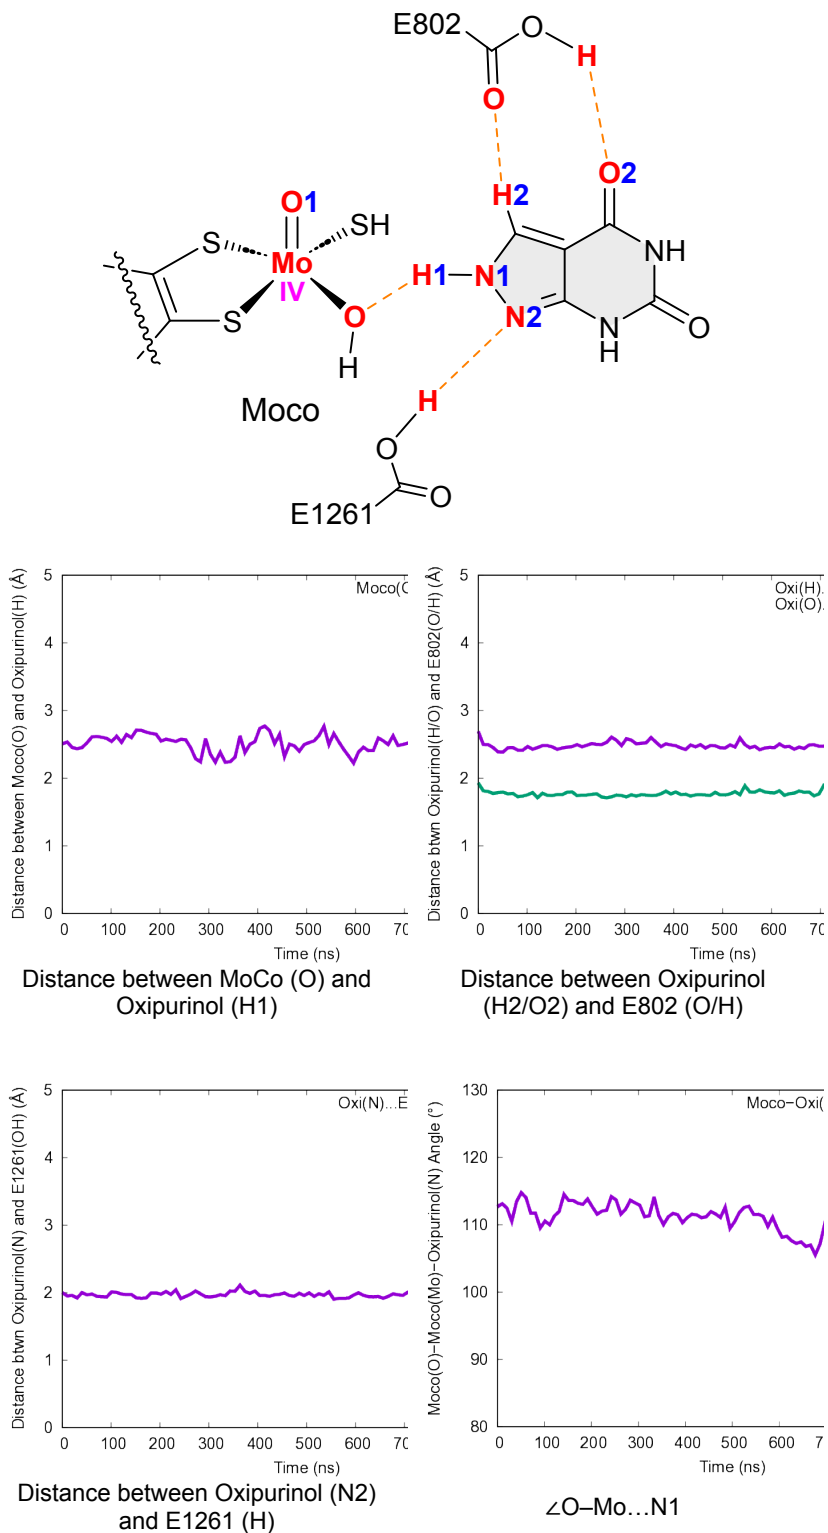

**Figure S9.** Structural analysis results for the MD simulation of the first replicate of the XO-OXI<sup>T-2</sup>. Areas of *correlation* in the residue-wise correlation matrix graph are blue (1.0), areas with *no correlation* are pale yellow (0.0), and areas with *anti-correlation* are red (-1.0).

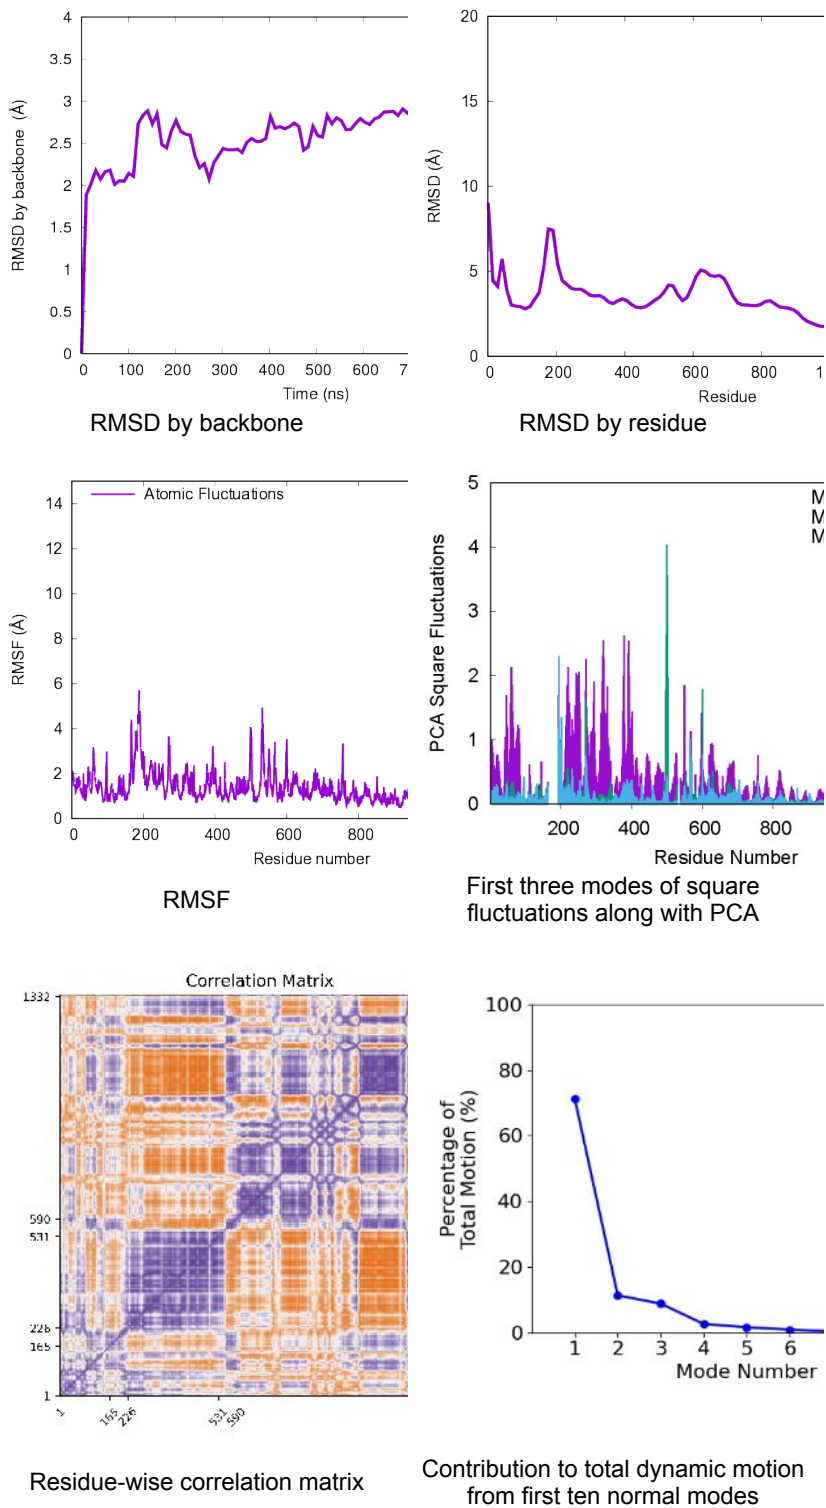

Figure S9. Continued.

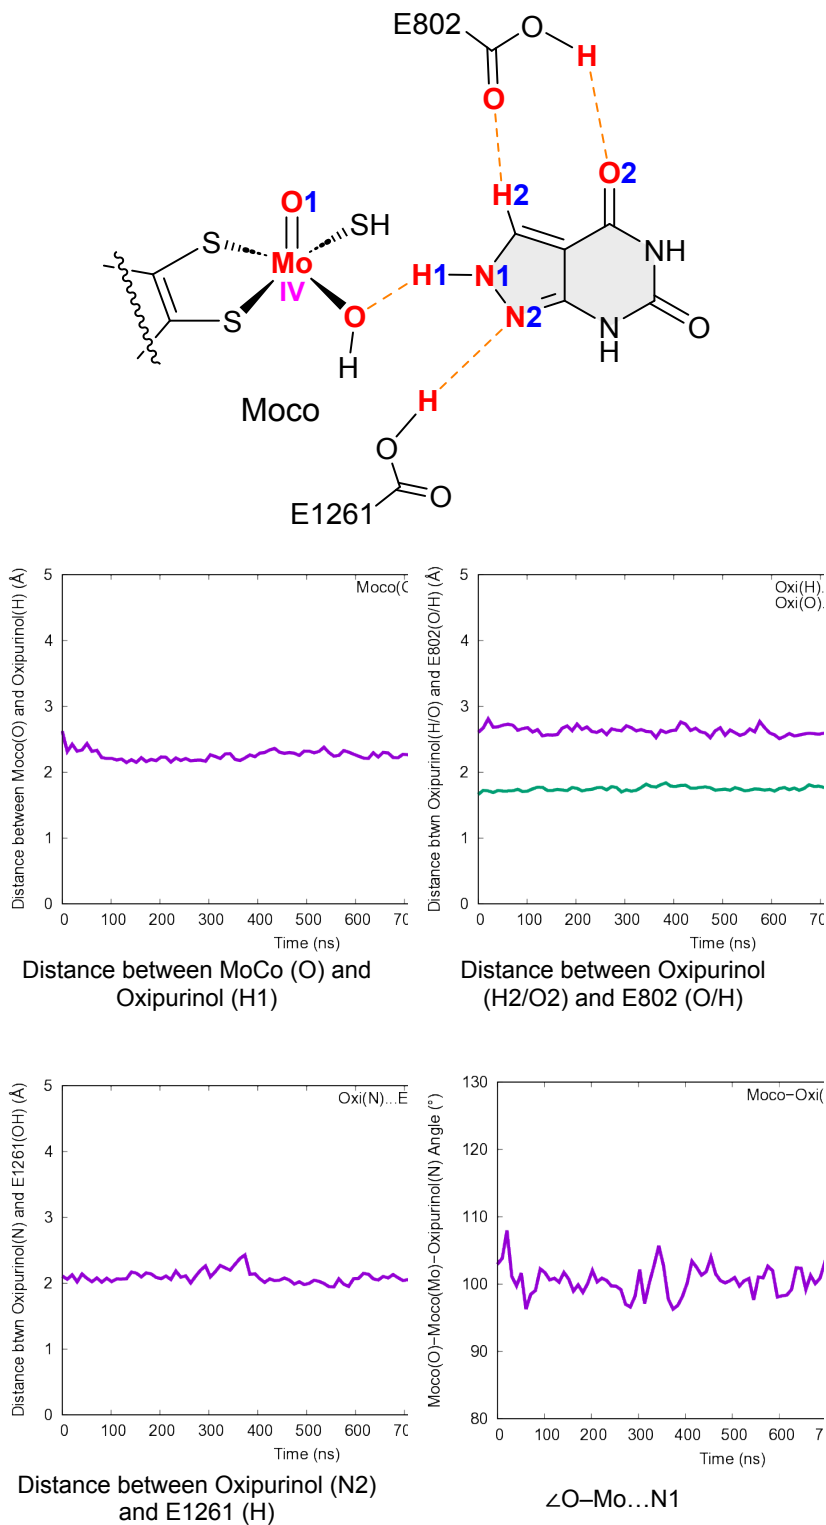

**Figure S10.** Structural analysis results for the MD simulation of the second replicate of the XO-OXI<sup>-2</sup>. Areas of *correlation* in the residue-wise correlation matrix graph are blue (1.0), areas with *no correlation* are pale yellow (0.0), and areas with *anti-correlation* are red (-1.0).



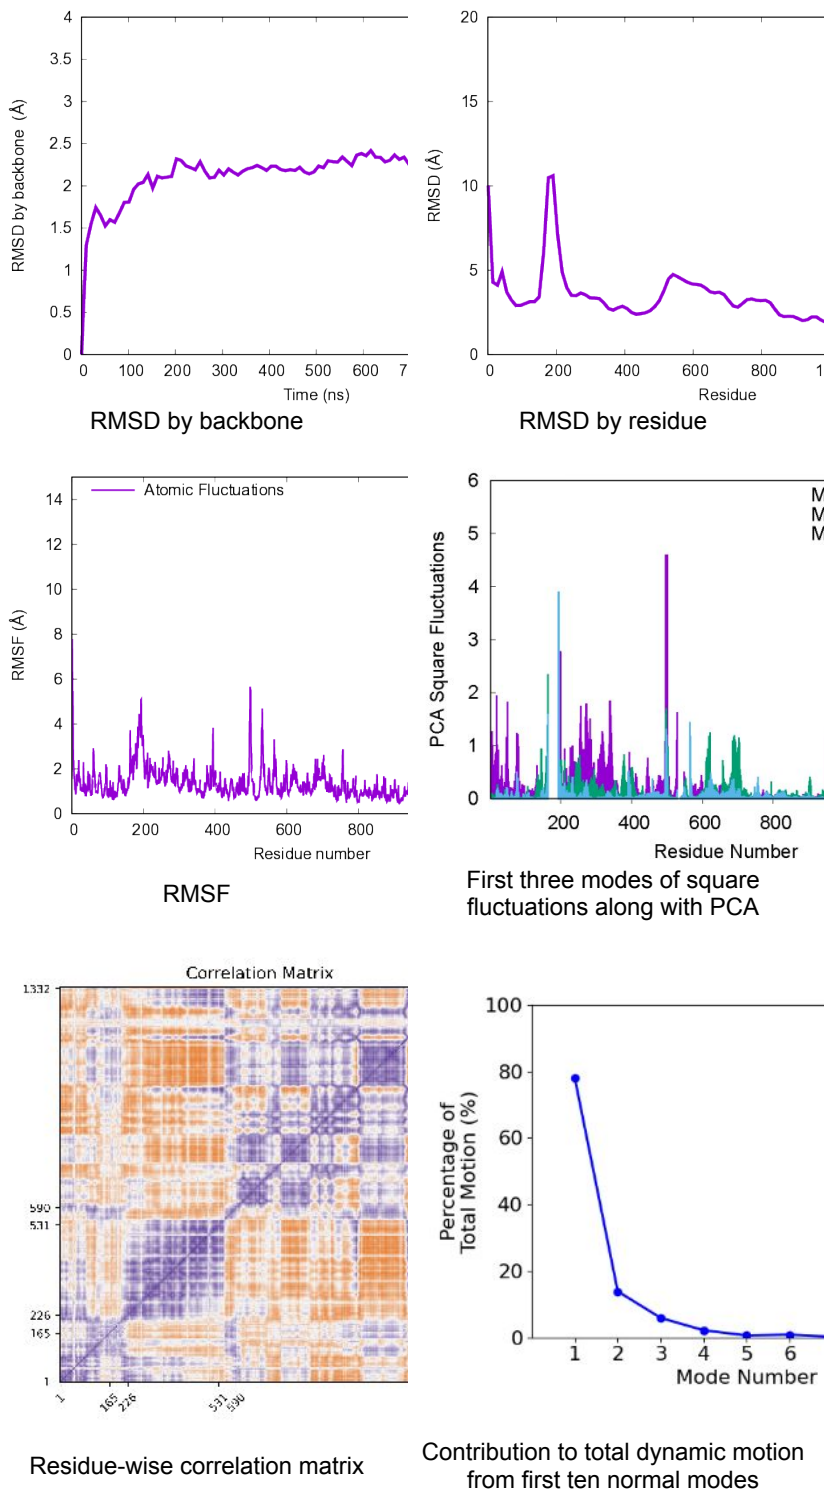

Figure S10. Continued.

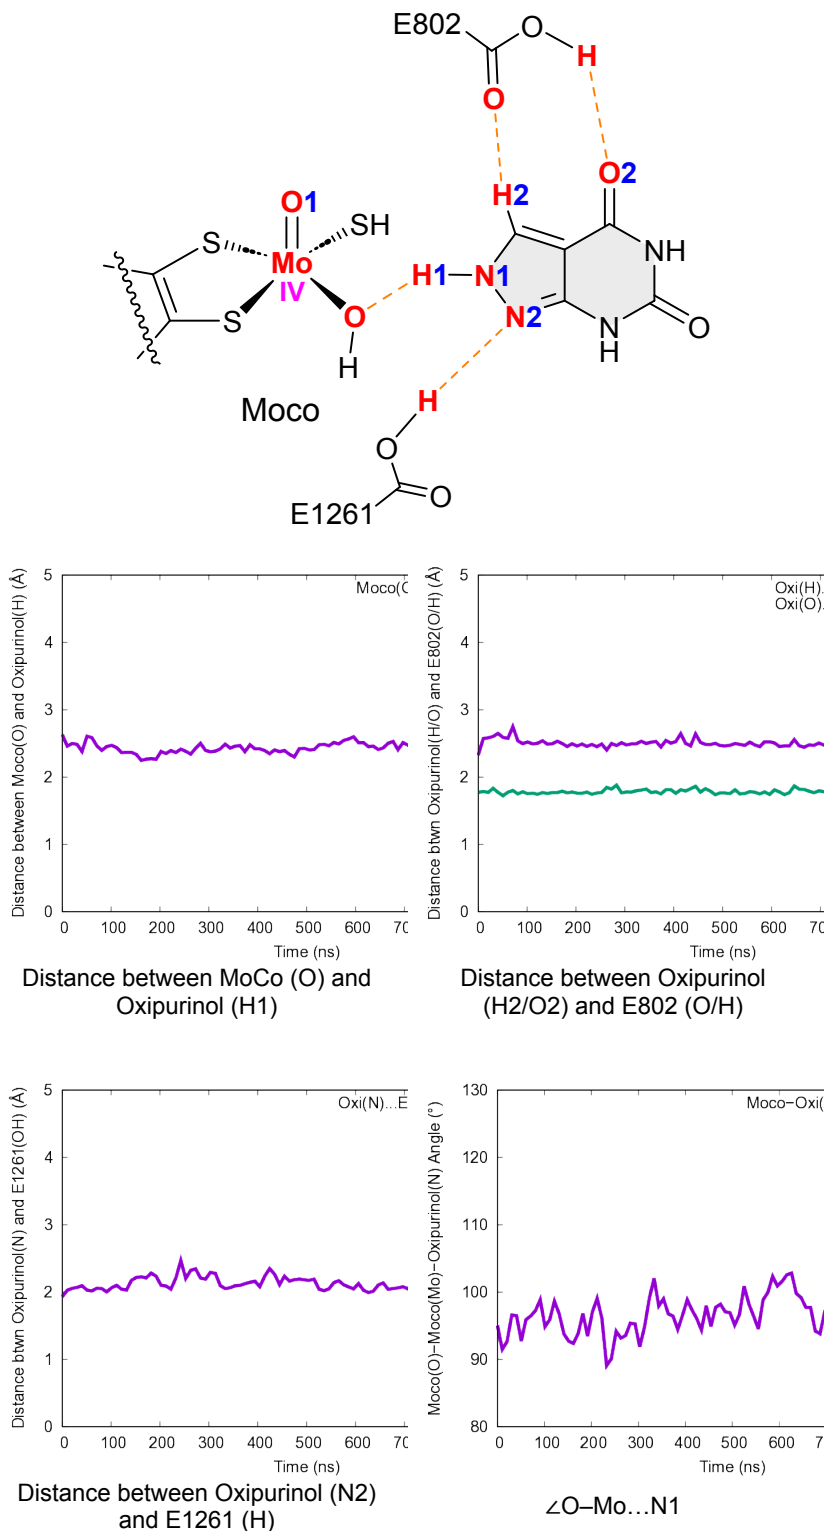

**Figure S11.** Structural analysis results for the MD simulation of the third replicate of the XO-OXI<sup>T-2</sup>. Areas of *correlation* in the residue-wise correlation matrix graph are blue (1.0), areas with *no correlation* are pale yellow (0.0), and areas with *anti-correlation* are red (-1.0). More explanations are provided on the next page.

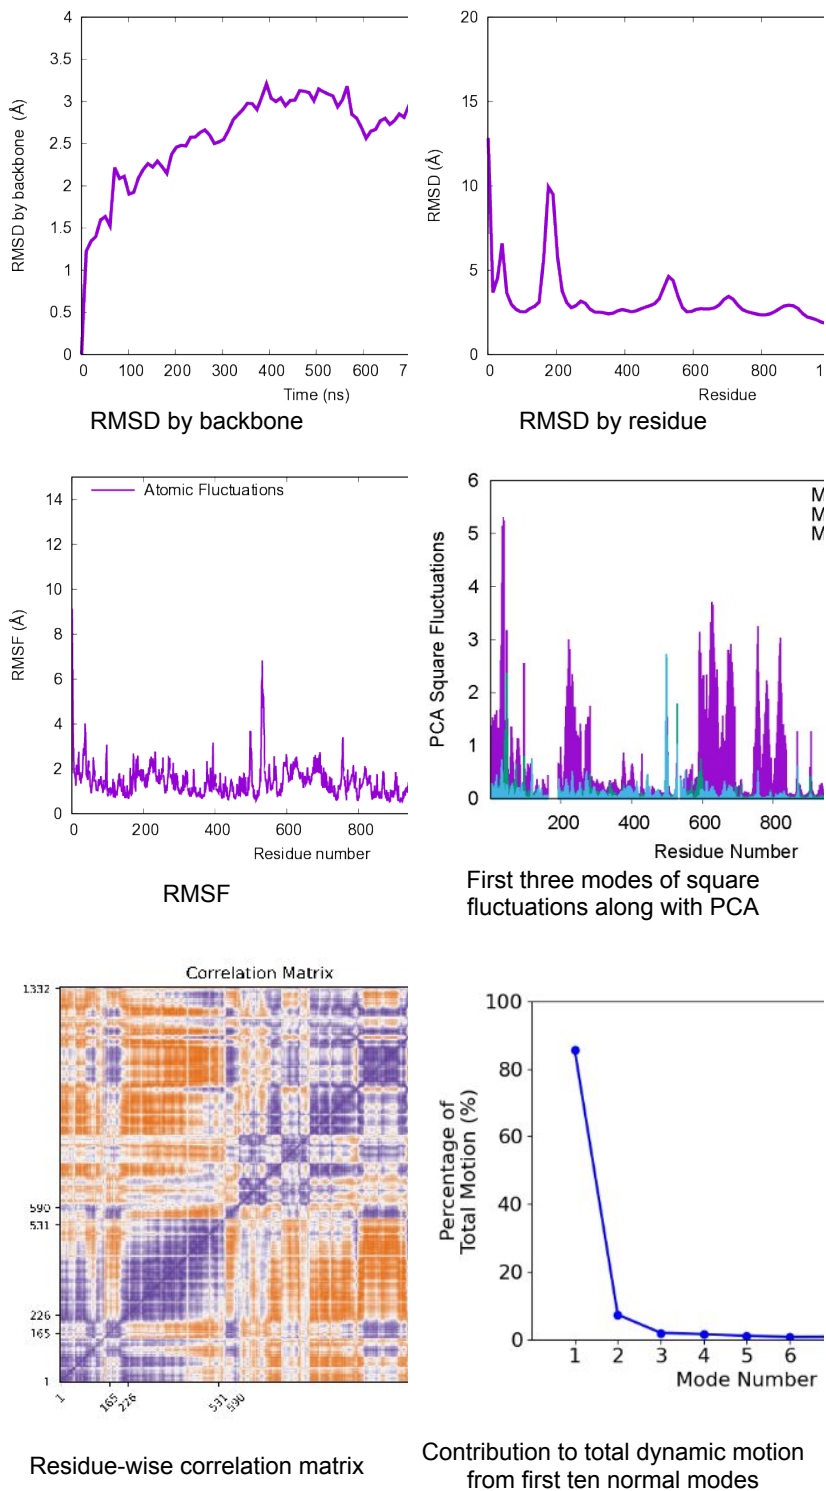

Figure S11. Continued.

## 4. Clustering Analysis

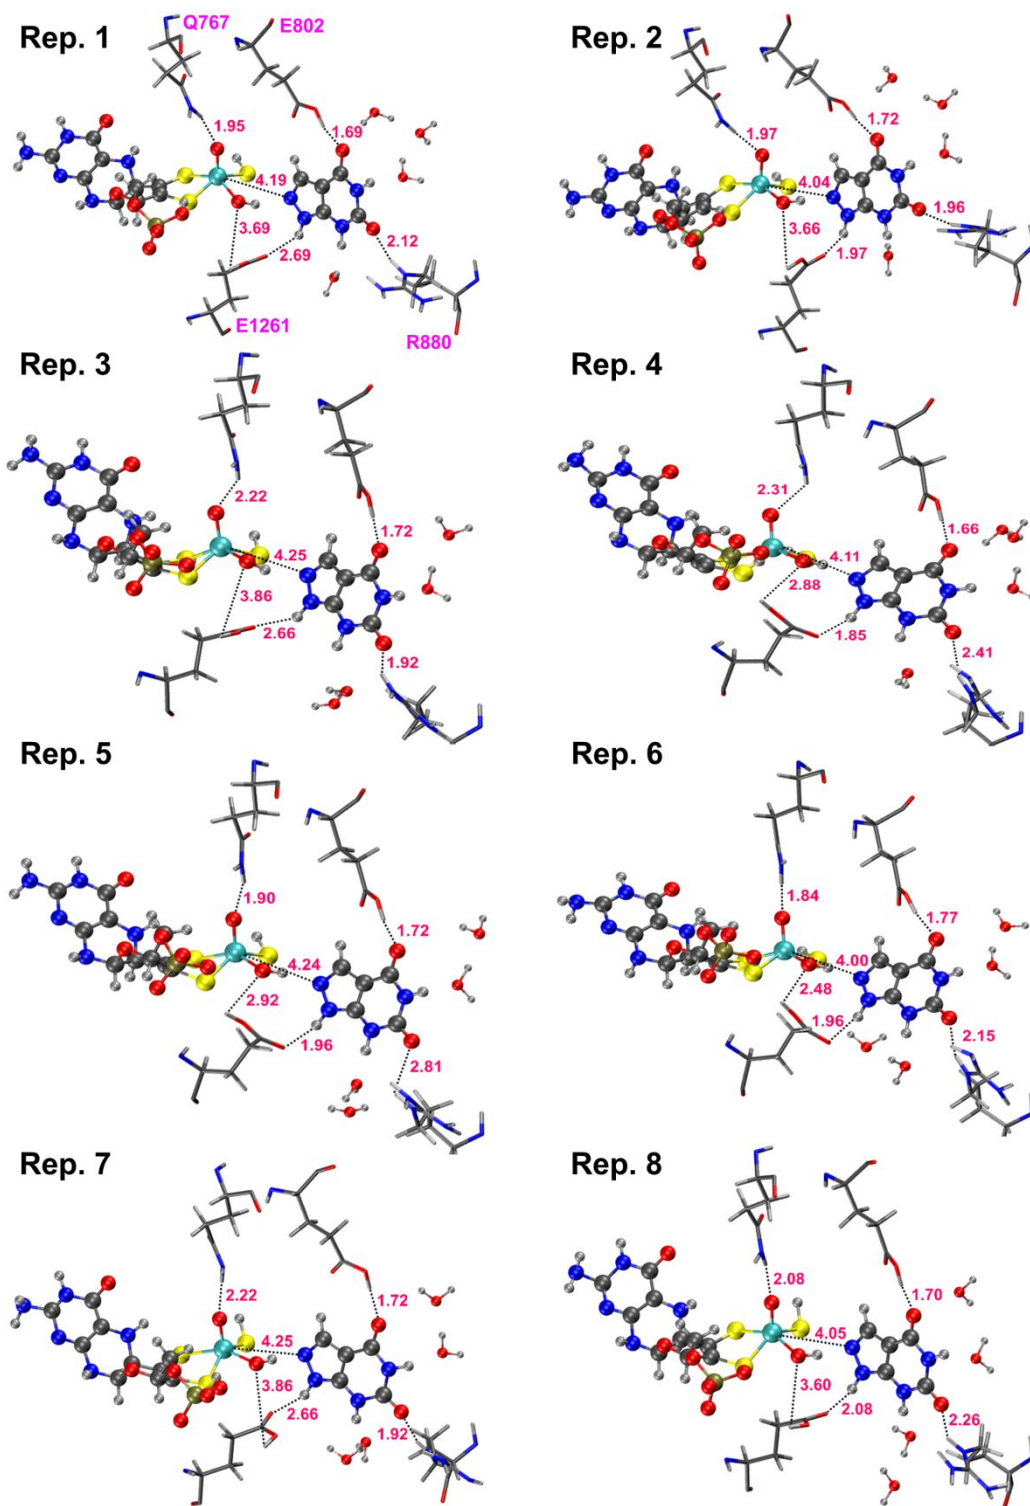

**Figure S12.** Selected frames from the clustering analysis and orientations of the active site residues in the XO–OXI bound system.

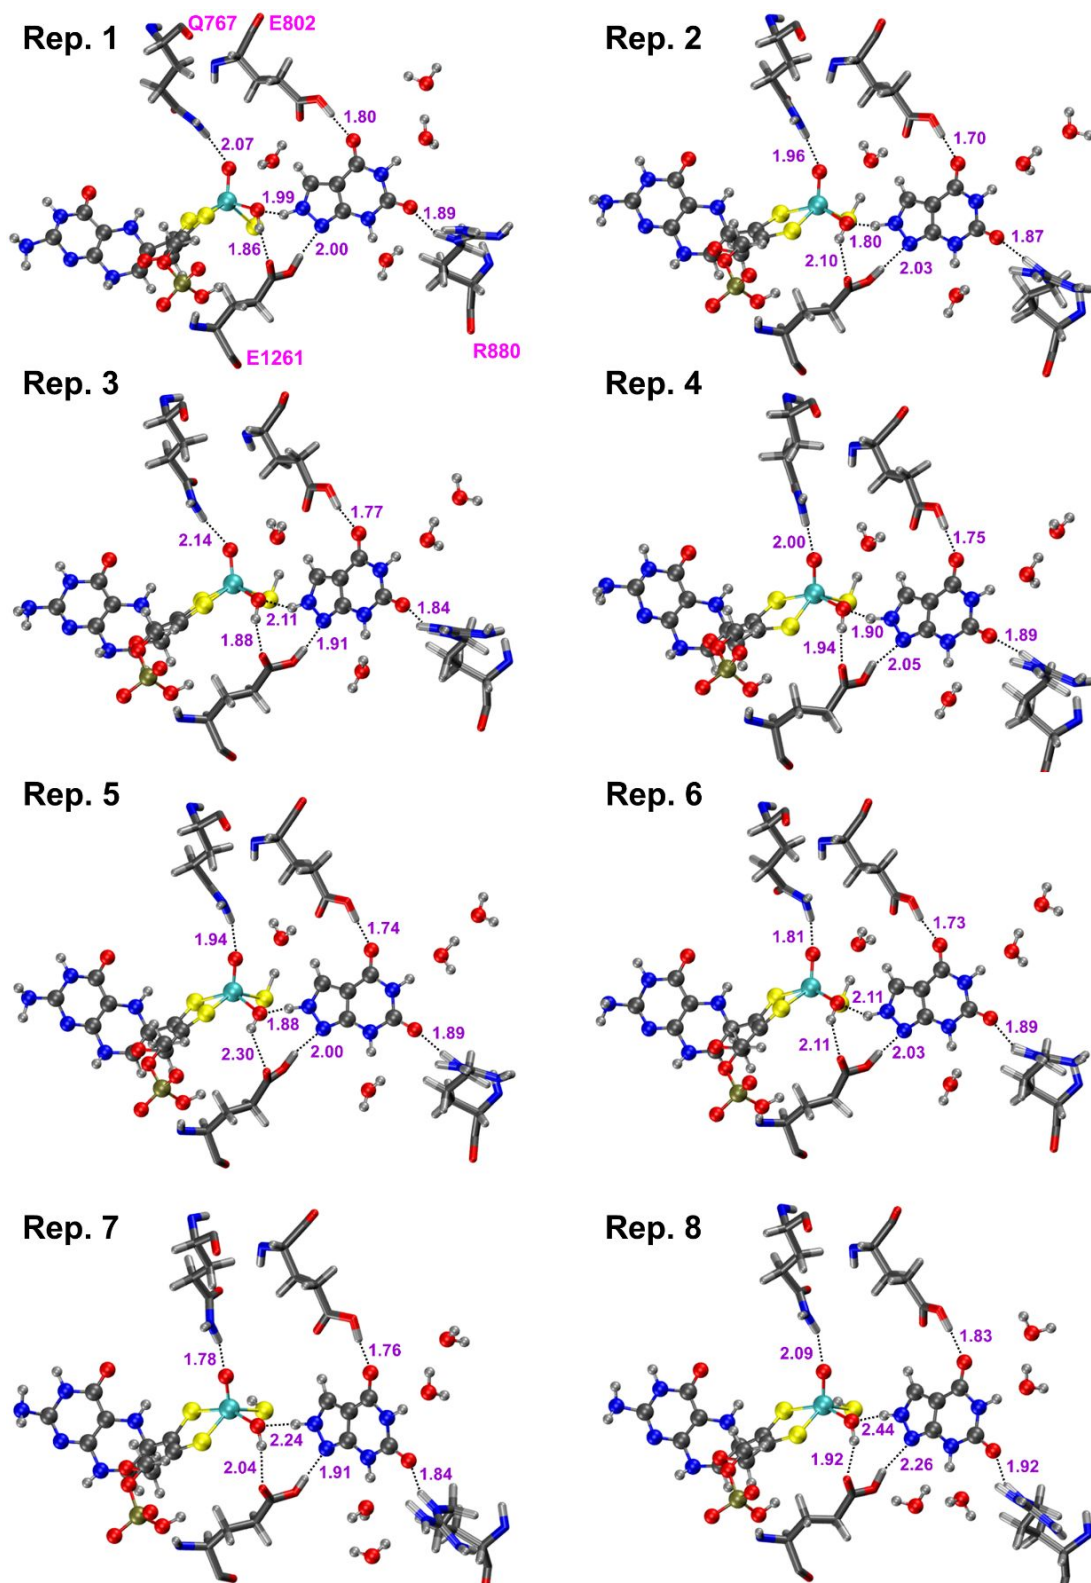

**Figure S13.** Selected frames from the clustering analysis and orientations of the active site residues in the XO-OXI<sup>-2</sup> bound system.

**Table S1.** Results of the *k*-means clustering and QM/MM optimization values for the selected representatives for XO–OXI systems. The QM/MM energies are calculated at the  $\omega$ B97X-D/def2-SVP//ff14SB level of theory. Additional information and files can be found in the ESI (ESI-3.zip).

**XO–OXI**

| Representative No. | Cluster No. | Frame No. | Abundance (%) | $E_{\text{Relative}}$ (kcal mol <sup>-1</sup> ) |
|--------------------|-------------|-----------|---------------|-------------------------------------------------|
| 1                  | 0           | 16317     | 17.1          | 344                                             |
| 2                  | 1           | 88160     | 16.5          | 649                                             |
| 3                  | 2           | 150161    | 12.9          | 476                                             |
| 4                  | 1           | 190874    | 16.5          | 686                                             |
| 5                  | 0           | 199718    | 17.1          | 386                                             |
| 6                  | 0           | 236571    | 17.1          | 0                                               |
| 7                  | 3           | 276558    | 10.7          | 155                                             |
| 8                  | 1           | 285895    | 16.5          | 647                                             |

**XO–OXI<sup>T-2</sup>**

| Representative No. | Cluster No. | Frame No. | Abundance (%) | $E_{\text{Relative}}$ (kcal mol <sup>-1</sup> ) |
|--------------------|-------------|-----------|---------------|-------------------------------------------------|
| 1                  | 5           | 128697    | 9.1           | 734                                             |
| 2                  | 2           | 128805    | 12.6          | 0                                               |
| 3                  | 0           | 130301    | 16.7          | 710                                             |
| 4                  | 2           | 160914    | 12.6          | 640                                             |
| 5                  | 2           | 162636    | 12.6          | 789                                             |
| 6                  | 5           | 190799    | 9.1           | 388                                             |
| 7                  | 0           | 215942    | 16.7          | 463                                             |
| 8                  | 3           | 260198    | 9.9           | 480                                             |

## 5. Components of the QM Subregion

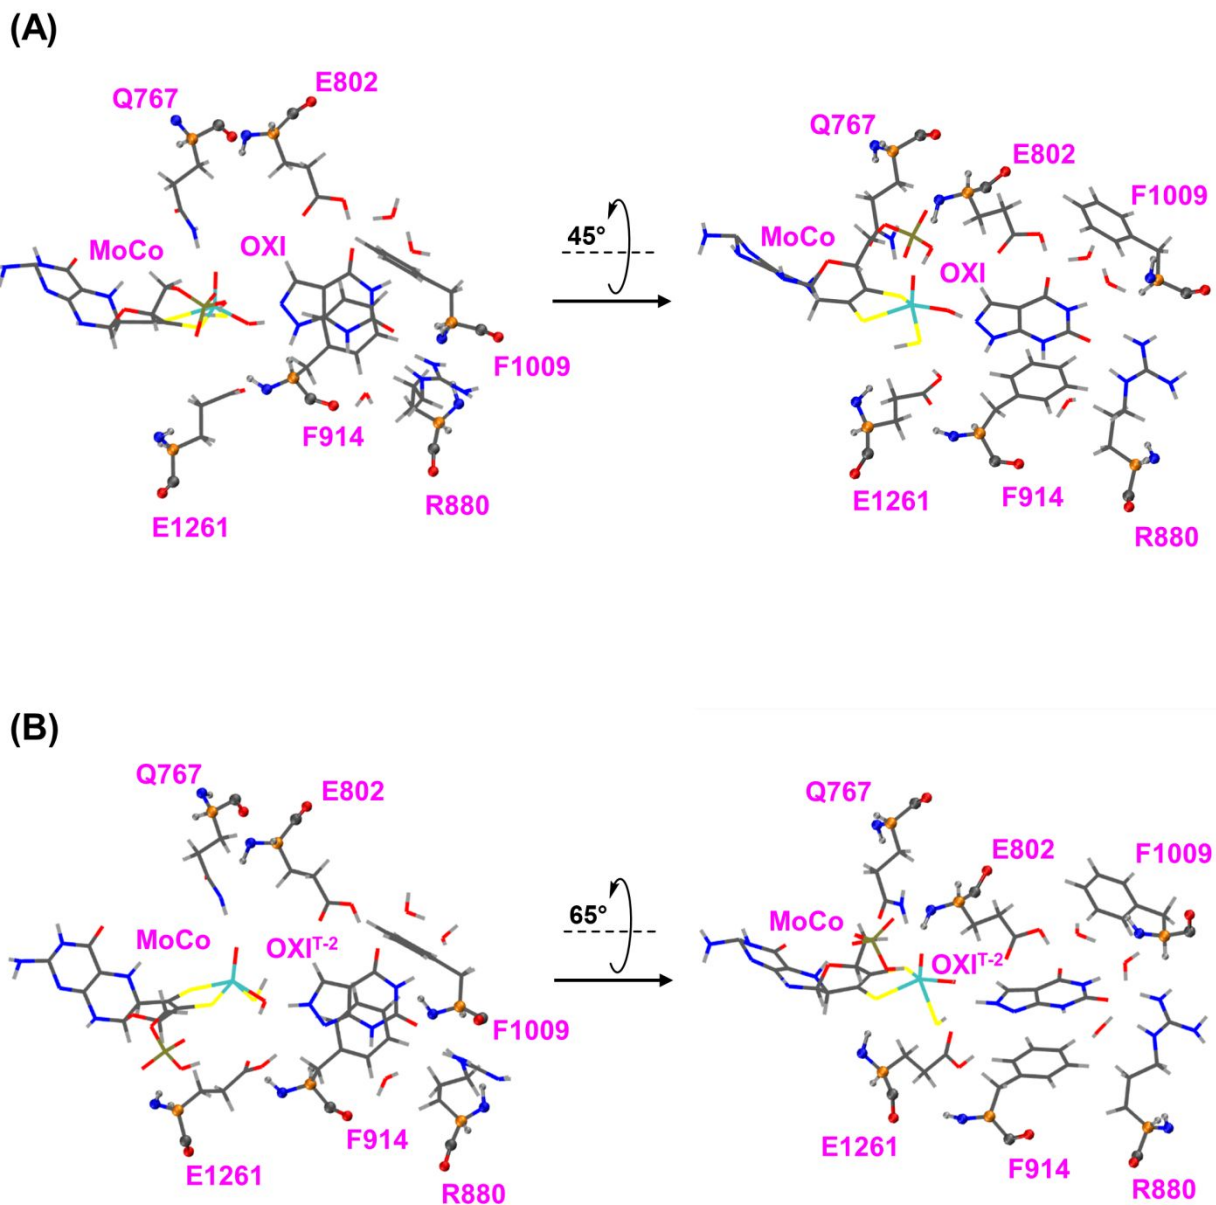

**Figure S14.** The QM subregion for (A) XO–OXI and (B) XO–OXI<sup>T-2</sup>, which comprises 145 atoms, including the MoCo, oxipurinol, Q767, E802, R880, F914, F1009, E1261, and water molecules within 3 Å of the inhibitor. Two different view angles are provided for each structure for enhanced clarity. All the QM atoms are shown in the sticks, while the boundary atoms (H<sub>α</sub>, C, O, N, and H) are shown in spheres and the C<sub>α</sub> pseudobond atoms are in orange balls.

## 6. Oxipurinol Tautomers

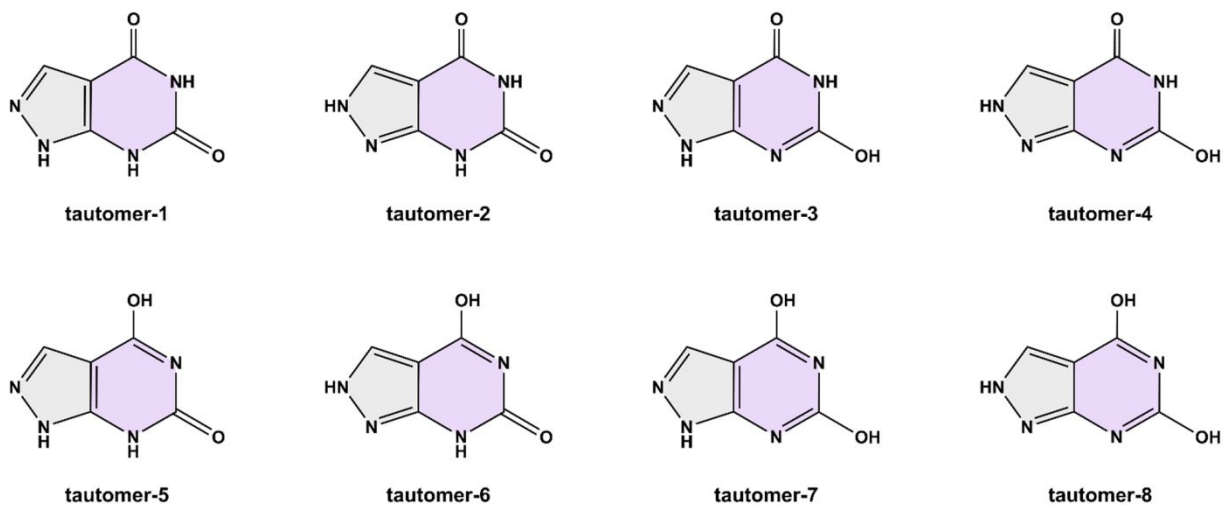

**Figure S15.** Schematics of eight tautomers of the neutral oxipurinol representing the di-keto, keto–enol, and di-enol forms. Plouvier and Choi [Ref. 197 in the manuscript] showed the probability of the existence of up to 38 tautomeric forms for the neutral oxipurinol; however, they noted that the functional derivative of this compound that possesses a biological activity (either functional or structural) is identical to tautomer-1.



## 7. EDA on the Pre-Catalytic Inhibition

**Table S2.** Residues with considerable non-bonded intermolecular interactions ( $|\Delta E_{NB}| \geq 12.0$  kcal mol<sup>-1</sup>) with the molybdenum cofactor of XO–OXI compared to apo-XO as the reference. The values of  $\Delta E_{NB}$  (in kcal mol<sup>-1</sup>) are calculated based on Eq. 3 in the manuscript.

| Stabilizing residues |                 | Destabilizing residues |                 |
|----------------------|-----------------|------------------------|-----------------|
| Residue              | $\Delta E_{NB}$ | Residue                | $\Delta E_{NB}$ |
| R31                  | -16.8           | E45                    | 13.3            |
| R32                  | -13.2           | E89                    | 13.2            |
| R37                  | -12.0           | E140                   | 12.9            |
| K40                  | -18.7           | E428                   | 13.5            |
| R149                 | -19.7           | D429                   | 14.7            |
| R154                 | -13.7           | E562                   | 12.5            |
| K269                 | -12.8           | D571                   | 12.9            |
| R426                 | -14.2           | E589                   | 12.9            |
| R575                 | -13.4           | D595                   | 17.1            |
| <b>K771*</b>         | <b>-14.6</b>    | <b>E652</b>            | <b>12.4</b>     |
| R790                 | -13.3           | <b>D740</b>            | <b>21.6</b>     |
| K792                 | -15.9           | E745                   | 26.1            |
| R793                 | -19.4           | D828                   | 14.7            |
| <b>K801</b>          | <b>-30.4</b>    | E831                   | 13.1            |
| <b>R804</b>          | <b>-14.3</b>    | D832                   | 21.1            |
| R824                 | -13.2           | <b>D872</b>            | <b>14.1</b>     |
| R829                 | -23.0           | <b>E879</b>            | <b>14.7</b>     |
| <b>R871</b>          | <b>-12.4</b>    | D886                   | 15.1            |
| <b>R880</b>          | <b>-18.4</b>    | E924                   | 14.2            |
| <b>R912</b>          | <b>-54.1</b>    | E949                   | 13.0            |
| R942                 | -13.2           | E960                   | 14.6            |
| R966                 | -13.4           | E970                   | 13.2            |
| R980                 | -12.2           | E1037                  | 24.7            |
| K1004                | -18.7           | E1065                  | 15.7            |
| K1045                | -31.3           | <b>D1084</b>           | <b>21.7</b>     |
| K1052                | -15.5           | D1177                  | 14.0            |
| <b>S1080</b>         | <b>-20.1</b>    | D1181                  | 22.4            |
| <b>K1134</b>         | <b>-12.6</b>    | D1191                  | 30.2            |
| R1175                | -12.5           | E1196                  | 22.7            |
| K1228                | -12.4           | E1209                  | 22.5            |
| R1240                | -13.0           | E1210                  | 13.7            |
| R1245                | -12.9           | E1238                  | 12.6            |
| K1250                | -12.6           | D1246                  | 12.3            |
| <b>K1251</b>         | <b>-16.8</b>    |                        |                 |
| <b>K1257</b>         | <b>-20.8</b>    |                        |                 |

\* Residues in bold text are located around the active site in the first- and second-shell of coordination.

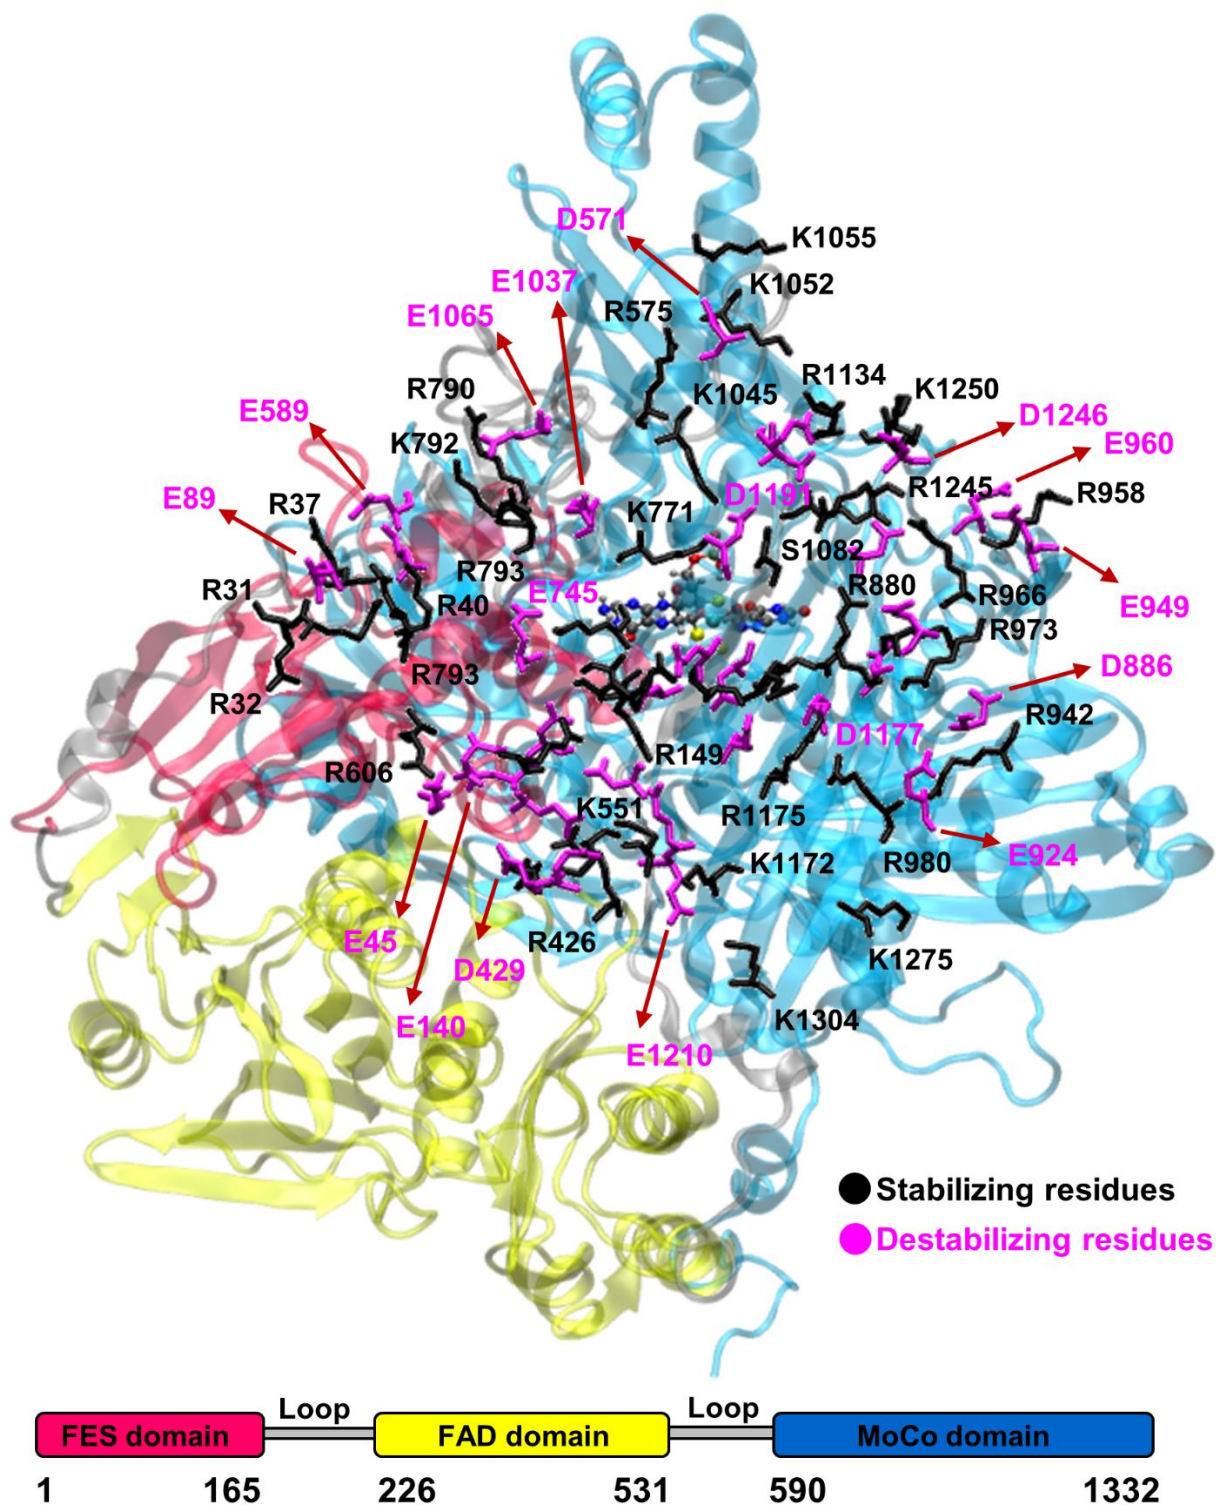

Table S2. Continued.

**Table S3.** Detailed list of the residues with stabilizing and destabilizing effects on the selected residues of the active site (MoCo, oxipurinol, and E1261) during the pre-catalytic inhibition of XO by oxipurinol.

| Stabilizing residues     |               | Destabilizing residues |             |
|--------------------------|---------------|------------------------|-------------|
| Residue                  | $E_{NB}$      | Residue                | $E_{NB}$    |
| R31                      | -36.8         | E45                    | 35.3        |
| R32                      | -38.5         | E89                    | 32.5        |
| R37                      | -31.2         | E103                   | 33.5        |
| <b>K40</b>               | <b>-43.0</b>  | E140                   | 35.5        |
| K95                      | -39.6         | D141                   | 30.8        |
| R104                     | -31.0         | E200                   | 31.1        |
| K107                     | -34.0         | E428                   | 36.3        |
| <b>R149</b> <sup>1</sup> | <b>-69.5</b>  | D429                   | 36.1        |
| <b>R154</b>              | <b>-49.0</b>  | D430                   | 34.1        |
| K269                     | -31.2         | E562                   | 36.3        |
| <b>R426</b>              | <b>-40.0</b>  | E570                   | 33.4        |
| R427                     | -31.2         | D571                   | 37.4        |
| K433                     | -31.1         | E589                   | 35.1        |
| K551                     | -33.1         | <b>D594</b>            | <b>40.4</b> |
| R575                     | -36.9         | <b>D595</b>            | <b>41.3</b> |
| <b>R606</b>              | <b>-35.2</b>  | E602                   | 32.5        |
| K713                     | -33.3         | E645                   | 32.0        |
| K716                     | -31.3         | D651                   | 41.2        |
| K754                     | -32.0         | <b>E652</b>            | <b>45.6</b> |
| <b>K771</b>              | <b>-53.9</b>  | E679                   | 31.7        |
| K778                     | -36.5         | E711                   | 30.5        |
| R790                     | -41.1         | <b>D740</b>            | <b>61.7</b> |
| <b>K792</b>              | <b>-45.5</b>  | <b>E745</b>            | <b>73.0</b> |
| <b>R793</b>              | <b>-55.9</b>  | E761                   | 35.4        |
| <b>K801</b>              | <b>-95.8</b>  | D828                   | 39.9        |
| <b>R804</b>              | <b>-54.1</b>  | E831                   | 38.2        |
| <b>R824</b>              | <b>-37.6</b>  | <b>D832</b>            | <b>60.4</b> |
| <b>R829</b>              | <b>-57.3</b>  | D862                   | 31.5        |
| <b>R839</b>              | <b>-61.1</b>  | <b>D872</b>            | <b>51.8</b> |
| <b>R871</b>              | <b>-49.7</b>  | <b>E879</b>            | <b>50.4</b> |
| <b>R880</b>              | <b>-80.1</b>  | <b>D886</b>            | <b>43.1</b> |
| K890                     | -34.9         | E924                   | 39.8        |
| R899                     | -31.2         | E939                   | 31.0        |
| K902                     | -31.9         | E949                   | 35.5        |
| <b>R912</b>              | <b>-143.0</b> | D951                   | 33.3        |
| R942                     | -36.5         | <b>E960</b>            | <b>41.7</b> |
| R958                     | -32.9         | D969                   | 31.7        |
| R966                     | -37.7         | E970                   | 35.7        |
| K973                     | -32.9         | <b>E1037</b>           | <b>84.5</b> |
| R980                     | -33.6         | <b>E1065</b>           | <b>49.5</b> |
| <b>K1004</b>             | <b>-49.3</b>  | <b>D1084</b>           | <b>73.5</b> |
| <b>K1045</b>             | <b>-104.8</b> | E1092                  | 38.0        |
| <b>K1052</b>             | <b>-42.1</b>  | E1143                  | 32.3        |
| K1055                    | -30.8         | D1177                  | 38.0        |
| K1060                    | -31.2         | <b>D1181</b>           | <b>56.3</b> |
| S1080                    | -38.4         | <b>E1092</b>           | <b>85.8</b> |
| R1100                    | -31.0         | <b>E1196</b>           | <b>58.9</b> |
| <b>R1134</b>             | <b>-44.1</b>  | <b>E1209</b>           | <b>61.1</b> |
| K1172                    | -31.7         | E1210                  | 39.8        |
| R1175                    | -34.4         | E1238                  | 33.8        |
| R1222                    | -33.0         | D1246                  | 36.7        |
| K1228                    | -35.9         | D1297                  | 33.4        |
| R1240                    | -35.0         | E1303                  | 32.0        |
| R1245                    | -36.4         |                        |             |
| <b>K1250</b>             | <b>-59.3</b>  |                        |             |
| <b>K1251</b>             | <b>-47.3</b>  |                        |             |
| K1257                    | -38.6         |                        |             |
| <b>R1282</b>             | <b>-33.0</b>  |                        |             |

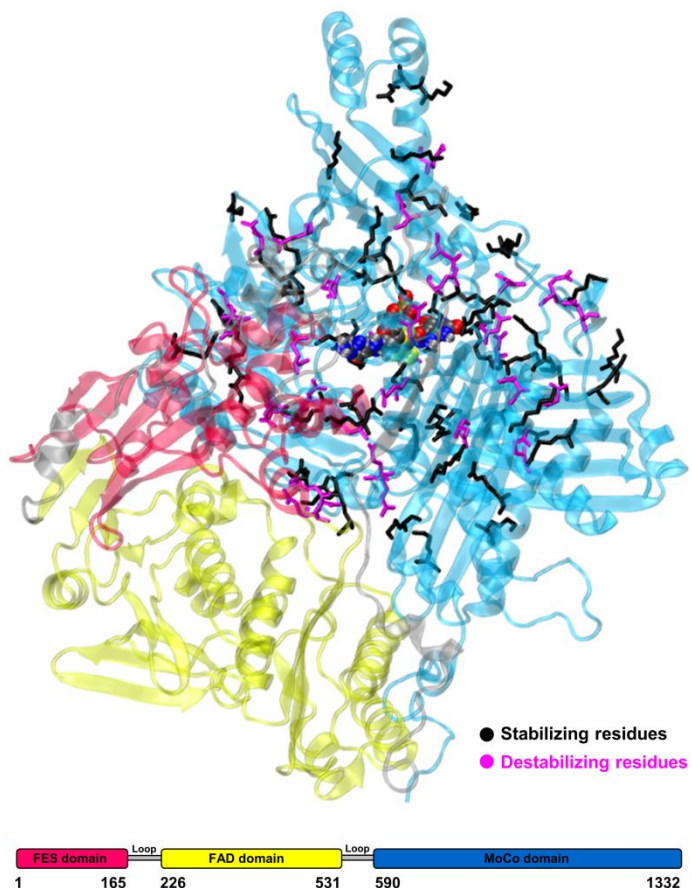

<sup>1</sup> Residues in bold text have significant contributions. Contributions with  $|E_{NB}| \geq 30$  kcal mol<sup>-1</sup> are listed in the table.

## 8. Binding Affinities

**Table S4.** Binding enthalpies (kcal mol<sup>-1</sup>) between the XO and oxipurinol calculated via the MM/GBSA approaches.

| GBSA components                   | XO–OXI                |                 |                 |                 |
|-----------------------------------|-----------------------|-----------------|-----------------|-----------------|
|                                   | Replicate 1           | Replicate 2     | Replicate 3     | The mean values |
| $E_{VdW}$                         | -23.1                 | -23.0           | -23.6           | -23.24          |
| $E_{EL}$                          | -38.6                 | -32.2           | -35.3           | -35.36          |
| $E_{GB}$                          | 38.4                  | 34.2            | 38.4            | 37.01           |
| $E_{SURF}$                        | -2.9                  | -2.9            | -2.9            | -2.92           |
| $\Delta H_{gas}$                  | -61.7                 | -55.2           | -58.9           | -58.6           |
| $\Delta H_{solv}$                 | 35.5                  | 31.2            | 35.6            | 34.1            |
| $\Delta H_{bind} \pm$ (Std. Dev.) | $-26.2 \pm 2.1$       | $-24.0 \pm 2.2$ | $-23.3 \pm 2.3$ | $-24.5 \pm 2.2$ |
| GBSA components                   | XO–OXI <sup>T-2</sup> |                 |                 |                 |
|                                   | Replicate 1           | Replicate 2     | Replicate 3     | The mean values |
| $E_{VdW}$                         | -24.2                 | -24.0           | -23.5           | -23.9           |
| $E_{EL}$                          | -31.0                 | -27.6           | -32.5           | -30.4           |
| $E_{GB}$                          | 31.4                  | 30.3            | 32.5            | 31.4            |
| $E_{SURF}$                        | -3.0                  | -2.9            | -2.9            | -2.9            |
| $\Delta H_{gas}$                  | -55.2                 | -51.6           | -56.0           | -54.3           |
| $\Delta H_{solv}$                 | 28.4                  | 27.4            | 29.6            | 28.5            |
| $\Delta H_{bind} \pm$ (Std. Dev.) | $-26.9 \pm 2.0$       | $-24.2 \pm 2.4$ | $-26.4 \pm 2.6$ | $-25.8 \pm 2.3$ |

## 9. QM/MM interaction Energies ( $IE_{QM/MM}$ )

**Table S5.** Calculated components of the QM/MM interaction energies ( $IE_{QM/MM}$ ).

| System                | $E_{QM}$ (kcal mol <sup>-1</sup> ) | $E_{MM}$ (kcal mol <sup>-1</sup> ) | $IE_{QM/MM}$ (kcal mol <sup>-1</sup> ) |
|-----------------------|------------------------------------|------------------------------------|----------------------------------------|
| XO–OXI                | -58.9                              | -61.1                              | -120.0                                 |
| XO–OXI <sup>T-2</sup> | -84.2                              | -40.0                              | -124.2                                 |

## 10. Electron Localization Functions (ELF)

**Table S6.** Results of the ELF populations (for the atoms in red color) in the critical structures during the XO–OXI complexation.

| Basin                             | Electron population ( $e^-$ ) |            |         |
|-----------------------------------|-------------------------------|------------|---------|
|                                   | Reactant                      | Approx. TS | Product |
| V(N8)                             | 2.9                           | –          | –       |
| V(Mo,N8)                          | –                             | –          | 3.1     |
| V(Mo,N8,C)                        | –                             | 2.7        | –       |
| V(O)                              | –                             | –          | 2.3/2.1 |
| V(Mo,O)                           | 5.8                           | 2.9        | –       |
| V(O,H)                            | 1.8                           | 1.7        | 1.8     |
| V(Mo,O,H)                         | –                             | 3.1        | –       |
| V(O,H $\epsilon$ )                | –                             | –          | 1.8     |
| V(O,H $\epsilon$ ,O $\epsilon$ 1) | –                             | 1.7        | –       |
| V(O $\epsilon$ 1)                 | 2.0/2.0                       | 2.6/2.9    | 2.7/2.7 |
| V(O $\epsilon$ 1,H $\epsilon$ )   | 1.8                           | 0.6        | –       |
| V(O $\epsilon$ 2)                 | 2.5/2.8                       | 2.5/2.7    | 2.5/3.0 |
| V(N9)                             | 1.3                           | 1.3        | 0.7     |
| V(N9,H9)                          | 2.2                           | 2.3        | 3.0     |

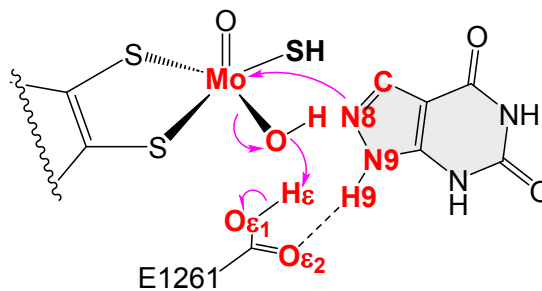

## 11. Non-covalent Interactions (NCI)

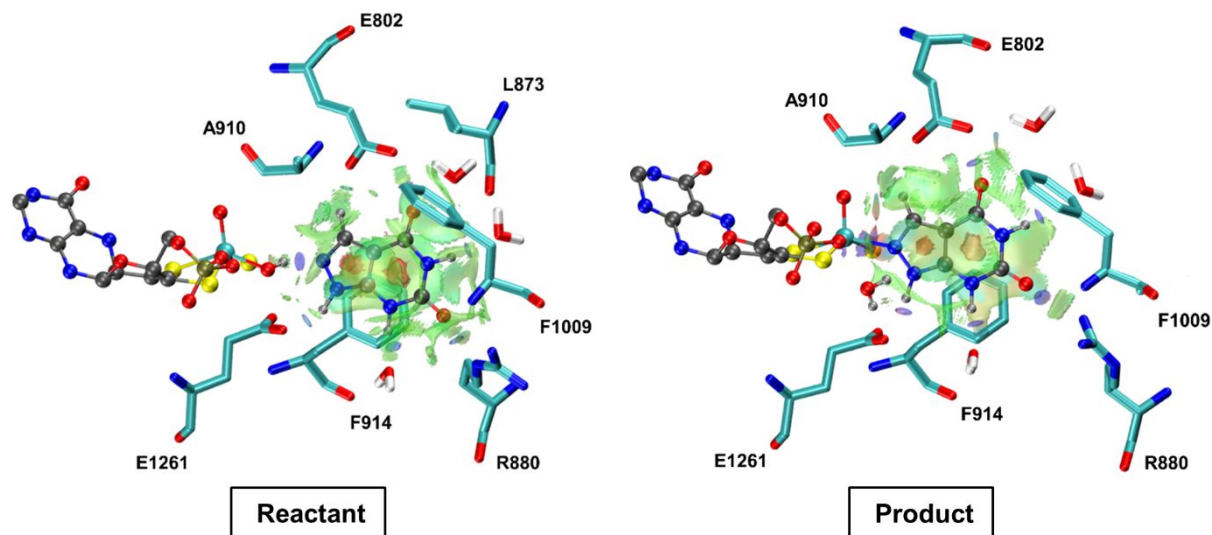

| Amino acid | Reactant | Product |
|------------|----------|---------|
| E802       | ✓        | ✓       |
| L873       | ✓        | —       |
| R880       | ✓        | ✓       |
| A910       | ✓        | —       |
| F914       | ✓        | ✓       |
| F1009      | ✓        | ✓       |
| A1078      | —        | ✓       |
| A1079      | —        | ✓       |
| E1261      | ✓        | ✓       |

**Figure S16.** Plots of the NCI between the oxipurinol and the surrounding residues in the reactant and product of the XO–OXI complexation. The MoCo and oxipurinol are illustrated in the ball-and-sticks, while the amino acids and water molecules are in the sticks with different color codes. Residues A1078 and A1079 has non-covalent interactions with the product but are not presented in the figure for more clarity.

## 12. Mutagenesis Studies vs. the Non-bonded Interaction

**Table S7.** Experimental mutagenesis studies and their effects on XO function versus corresponding non-bonded contributions ( $E_{NB}$ ) to the MoCo active site calculated via the EDA.

| Effect on XO function                            | Exp. Mutagenesis <sup>1</sup> | $E_{NB}$ (kcal mol <sup>-1</sup> ) |
|--------------------------------------------------|-------------------------------|------------------------------------|
| Complete loss of function                        | E802V                         | -12.3                              |
|                                                  | R880Q/R880G/R880V             | -79.5                              |
|                                                  | E1261A                        | N/A <sup>2</sup>                   |
| Partial or total loss of function                | R149C                         | -70.8                              |
|                                                  | G799S                         | -10.7                              |
|                                                  | H884Y                         | -12.9                              |
|                                                  | N887K                         | -9.2                               |
|                                                  | R912W                         | -155.8                             |
|                                                  | A1079T                        | -17.8                              |
| Low XO activity <sup>3</sup><br>(hypouricemia)   | R228T                         | -18.6                              |
|                                                  | R606Q                         | -36.1                              |
|                                                  | K721X                         | -22.5                              |
|                                                  | R824X                         | -38.2                              |
|                                                  | R1282X                        | -25.4                              |
| High XO activity <sup>3</sup><br>(hyperuricemia) | I702V                         | 4.3                                |
|                                                  | H1220R                        | 2.7                                |
|                                                  | T909M                         | 3.2                                |

<sup>1</sup> Corresponding references for the mutations are given in the manuscript.

<sup>2</sup> E1261 is included in the active site for the EDA. Thus, it has no non-covalent contribution to the active site.

<sup>3</sup> Clinical studies on the mutagenesis of XO, in which either the mutations led to xanthinuria or hyperuricemia.

### 13. Tautomer-2 (OXI<sup>T-2</sup>)

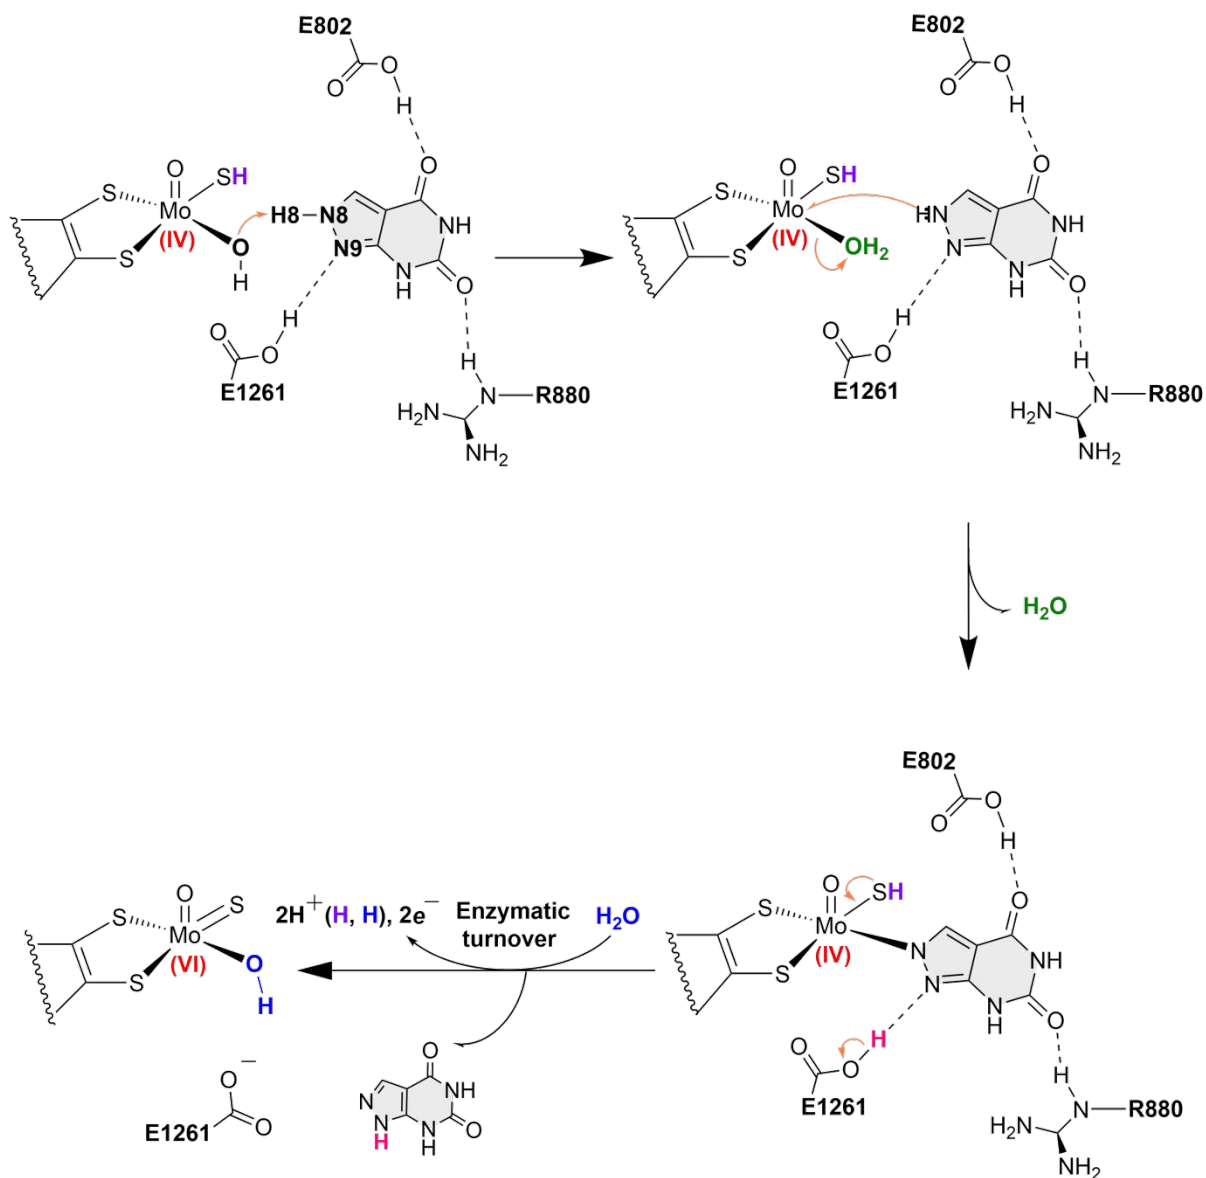

**Figure S17.** Studied mechanism for the catalytic inhibition of XO by OXI<sup>T-2</sup>.

The proposed mechanism for OXI<sup>T-2</sup> involves a proton transfer from the N8 nitrogen of this tautomer to the OH ligand of MoCo, forming an OH<sub>2</sub> ligand. This ligand is then replaced by the N8 of oxipurinol, leading to the MoCo–OXI<sup>T-2</sup> complexation (see animation in the SI). In the final step, the complex is dissociated by a nucleophilic attack from a hydroxide ion, resulting in the re-oxidation of the molybdenum to its original oxidation state.



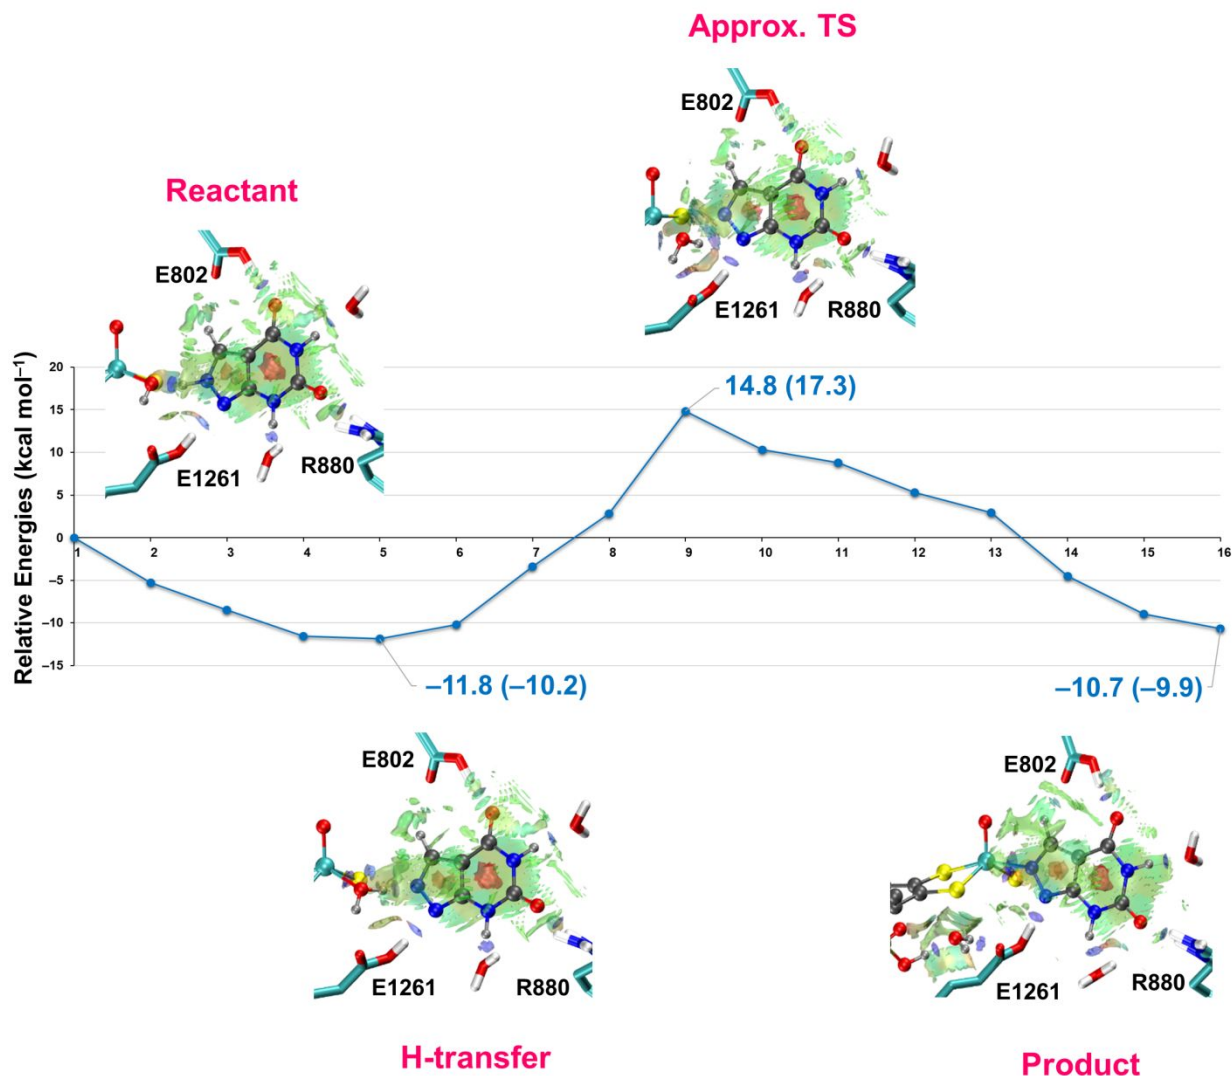

**Figure S18. (A)** The minimum energy path for the catalytic inhibition of XO by  $\text{OXI}^{\text{T-2}}$  modeled via the QSM. The QM/MM optimization energies ( $\text{kcal mol}^{-1}$ ) are calculated at the  $\omega\text{B97X-D/def2-SVP}$  level of theory with AMBER ff14SB force field. The values in parenthesis correspond to the Gibbs free energies obtained from the vibrational analysis using the Eyringpy. The NCI plots between the critical structures and the surrounding residues are also provided.

The  $\text{XO-OXI}^{\text{T-2}}$  reaction is exergonic ( $\Delta E_{\text{react}} = -10.7 \text{ kcal mol}^{-1}$  and  $\Delta G_{\text{react}} = -9.9 \text{ kcal mol}^{-1}$ ). It involves a spontaneous proton transfer from N8 of  $\text{OXI}^{\text{T-2}}$  to the hydroxyl ligand of MoCo ( $\text{Mo-OH}\dots\text{H8}\dots\text{N8}$ ) resulting in a more stable structure (bead 5) with a stability increase of  $11.8(10.2) \text{ kcal mol}^{-1}$ . The energy barrier to reach the approximate TS of  $\text{XO-OXI}^{\text{T-2}}$  is  $14.8(17.3) \text{ kcal mol}^{-1}$  as the  $\text{Mo}\dots\text{H}_2\text{O}$  bond cleaves and the  $\text{Mo}\dots\text{N8}$  bond forms. Calculated result of the backward barrier for this form is  $25.5(27.2) \text{ kcal mol}^{-1}$ , which is in good agreement with the experimental activation energy values for the spontaneous reactivation process ( $\Delta G_{\text{react}}^\ddagger = 27 \text{ kcal mol}^{-1}$  for bovine XO).

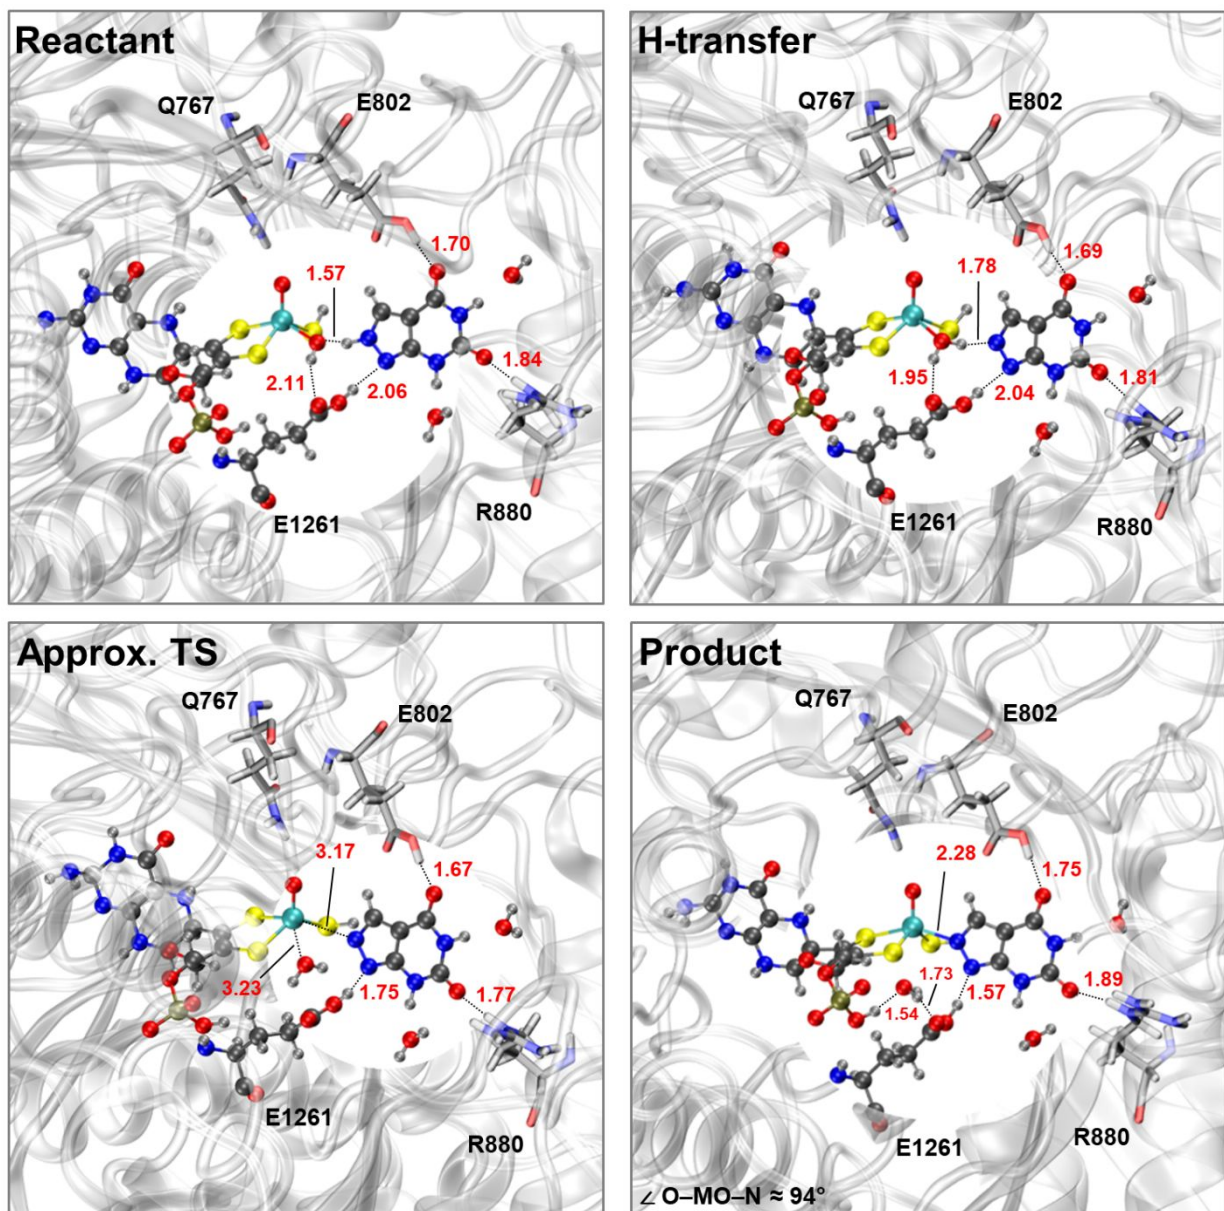

**Figure S19.** The optimized geometries of the critical structures of the catalytic inhibition of XO by  $\text{OXI}^{\text{T}-2}$ . Values of the selected distances are in angstrom. The MoCo, E1261, and oxipurinol are shown in the ball-and-sticks, while the amino acids of the binding pocket are shown in the sticks. The QM/MM-optimized O–Mo–N angle and Mo–N distance for the product are  $94^\circ$  and 2.28 Å, which agrees with the experimental values of  $94.97^\circ$  and 2.28 Å in the referenced PDB.

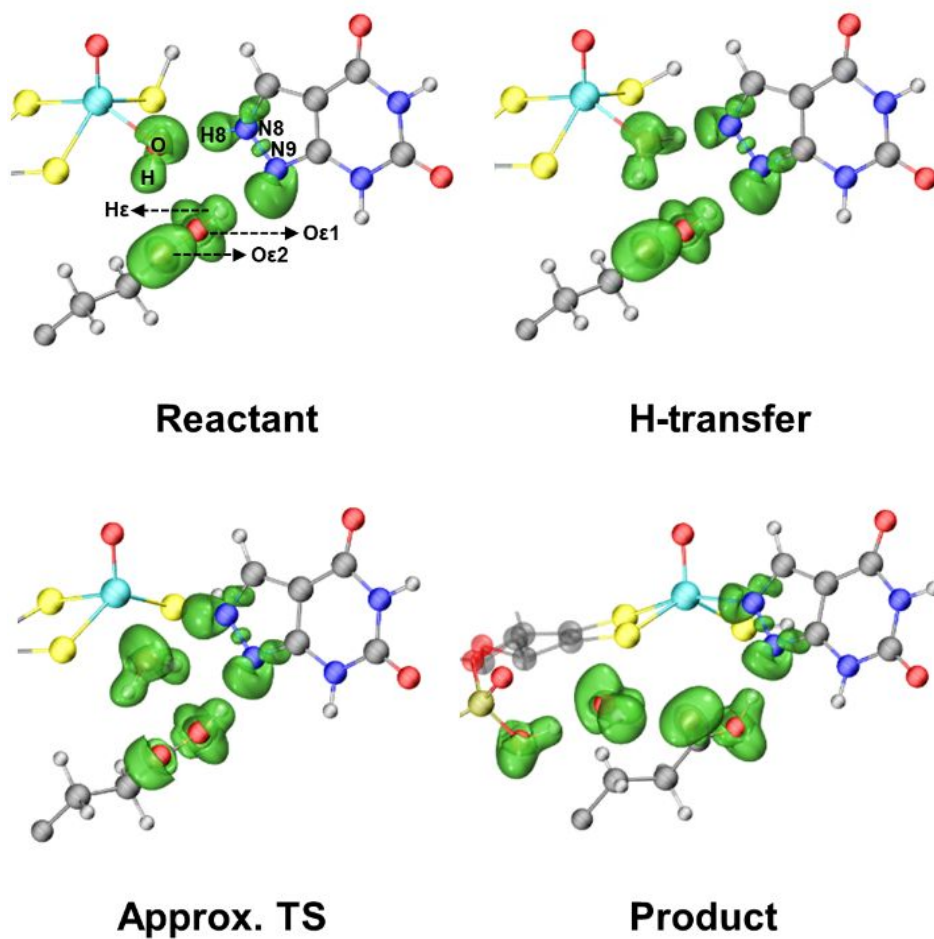

| Basin      | Electron population ( $e^-$ ) |            |            |         |
|------------|-------------------------------|------------|------------|---------|
|            | Reactant                      | H-transfer | Approx. TS | Product |
| V(N8)      | 1.6                           | 3.0        | –          | –       |
| V(N8,H8)   | 1.5                           | –          | –          | –       |
| V(Mo,N8)   | –                             | –          | –          | 2.9     |
| V(Mo,N8,C) | –                             | –          | 3.0        | –       |
| V(O)       | –                             | –          | 2.3        | 2.0/2.3 |
| V(Mo,O)    | 4.6                           | 2.4        | –          | –       |
| V(O,H)     | 1.7                           | 1.8        | 1.7        | 1.7     |
| V(Mo,O,H)  | –                             | –          | 2.1        | –       |
| V(O,H8)    | –                             | 1.9        | 1.8        | 1.8     |
| V(Oε1)     | 4.1                           | 4.0        | 4.0        | 4.0     |
| V(Oε1,Hε)  | 1.9                           | 1.9        | 1.9        | 2.0     |
| V(Oε2)     | 2.5/2.7                       | 2.6/2.7    | 2.7/2.6    | 2.7/2.6 |

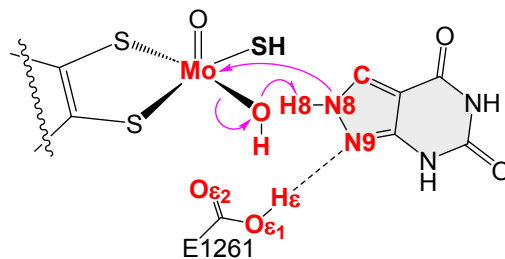

**Figure S20.** The ELF basins and populations for the critical structures along the XO–OXI<sup>T-2</sup> inhibition reaction pathway.

The depiction of the ELF basins indicate the formation of V(O,H8) disynaptic basin ( $1.9 e^-$ ) in the H-transfer step. It is worth mentioning that the electron population for V(N9,H9) in the reactant of XO–OXI (the major tautomer) is  $2.2 e^-$ , while this value for V(N8,H8) in XO–OXI<sup>T-2</sup> is  $1.5 e^-$ . This  $0.7 e^-$  difference, combined with the NCI surfaces detected between the H8 of OXI<sup>T-2</sup> and the hydroxyl ligand of MoCo (see **Figure S18**), as well as the short Mo–O...H8–N8 distance of  $1.57 \text{ \AA}$  (see **Figure S19**), may provide an explanation for the spontaneous proton transfer. In the approximate TS, the formation of trisynaptic basins, V(Mo,N8,C) and V(Mo,O,H), with population values of  $3.0 e^-$  and  $2.1 e^-$ , respectively, suggests the initiation of Mo–N8 formation and the cleavage of Mo–H<sub>2</sub>O bonds. Eventually, V(Mo–N8) disynaptic basin with a population of  $1.9 e^-$  forms in the product due to complexation.
